# Supplementary material for: A missense in HSF2BP causing primary ovarian insufficiency affects meiotic recombination by its novel interactor C19ORF57/BRME1
Source: eLife. 2020 Aug 26;9:e56996. doi: 10.7554/eLife.56996 (PMC7498267; doi:10.7554/eLife.56996)
Supplement: Source data 1. [file elife-56996-data1.xlsx]

## Sheet: Figure 2A_
						FEMALES
				Litters/month				Pups/Litter
	Mice			Hsf2bp +/+	Hsf2bp S167L/S167L			Hsf2bp +/+	Hsf2bp S167L/S167L
	6 Hsf2bp +/+		Mice 1	0.583333	0.5		Mice 1	6.16667	4
	7 Hsf2bp S167L/S167L		Mice 2	0.833333	0.181818		Mice 2	6.1	4.5
			Mice 3	0.714286	0.285714		Mice 3	8.6	5
			Mice 4	0.9	0.666667		Mice 4	7.66667	7.28571
			Mice 5	1	0.583333		Mice 5	7.66667	6.5
			Mice 6	0.727273	0.571429		Mice 6	6.57143	5
			Mice 7		0.777778		Mice 7		7.42857
			Mean	0.793038	0.464827		Mean	7.12857	5.67347
			SD	0.148594	0.209566		SD	1.00378	1.38127
						MALES
				Litters/month				Pups/Litter
	Mice			Hsf2bp +/+	Hsf2bp S167L/S167L			Hsf2bp +/+	Hsf2bp S167L/S167L
	6 Hsf2bp +/+		Mice 1	1.25	0.4		Mice 1	6.4	4
	6 Hsf2bp S167L/S167L		Mice 2	1.25	0.333333		Mice 2	7.4	5
			Mice 3	1.2	0.25		Mice 3	7.66667	1.5
			Mice 4	0.75	1		Mice 4	5.33	10.5
			Mice 5	1	1		Mice 5	7.75	8.33333
			Mice 6	0.93	1		Mice 6	7.17	8
			Mean	1.06333	0.663889		Mean	6.95278	6.22222
			SD	0.204124	0.371247		SD	0.930738	3.306

## Sheet: Figure 2C_
								5dpp
								Number of Primordial follicles					Number of Primary follicles
					Ovaries 5dpp			Hsf2bp +/+	Hsf2bp S167L/S167L	Hsf2bp -/-			Hsf2bp +/+	Hsf2bp S167L/S167L	Hsf2bp -/-
					5 Hsf2bp +/+		Ovary 1	684	885	17		Ovary 1	135	175	18
					5 Hsf2bp S167L/S167L		Ovary 2	554	558	19		Ovary 2	117	68	15
					4 Hsf2bp -/-		Ovary 3	720	523	14		Ovary 3	138	60	8
							Ovary 4	507	562	20		Ovary 4	126	84	12
							Ovary 5	603	619			Ovary 5	84	101
							Mean	613.6	629.4	17.5		Mean	120	97.6	13.25
							SD	88.4664	146.97	2.64575		SD	21.7371	46.0359	4.272
			6 weeks
			Number of Primordial follicles					Number of Primary follicles					Number of Secondary follicles					Number of Antral follicles
Ovaries 6 weeks			Hsf2bp +/+	Hsf2bp S167L/S167L	Hsf2bp -/-			Hsf2bp +/+	Hsf2bp S167L/S167L	Hsf2bp -/-			Hsf2bp +/+	Hsf2bp S167L/S167L	Hsf2bp -/-			Hsf2bp +/+	Hsf2bp S167L/S167L	Hsf2bp -/-
5 Hsf2bp +/+		Ovary 1	74	75	2		Ovary 1	44	39	2		Ovary 1	26	29	1		Ovary 1	16	10	6
5 Hsf2bp S167L/S167L		Ovary 2	142	285	8		Ovary 2	44	107	3		Ovary 2	50	45	6		Ovary 2	4	16	2
3 Hsf2bp -/-		Ovary 3	280	196	7		Ovary 3	77	94	3		Ovary 3	30	32	0		Ovary 3	9	7	1
		Ovary 4	82	102			Ovary 4	62	67			Ovary 4	26	15			Ovary 4	11	7
		Ovary 5	189	99			Ovary 5	37	57			Ovary 5	22	31			Ovary 5	15	12
		Mean	153.4	151.4	5.66667		Mean	52.8	72.8	2.66667		Mean	30.8	30.4	2.33333		Mean	11	10.4	3
		SD	84.8929	87.8368	3.21455		SD	16.3921	27.5899	0.57735		SD	11.0995	10.6677	3.21455		SD	4.84768	3.78153	2.64575

## Sheet: Figure 2F_
				% of meiotic divisions
	Mice			positive for TUNEL staining
	3 Hsf2bp +/+			Hsf2bp +/+	Hsf2bp S167L/S167L
	3 Hsf2bp S167L/S167L		Mice 1	6.68	41.65
			Mice 2	2.67	44.68
			Mice 3	3.74	36.82
			Mean	4.36333	41.05
			SD	2.0764	3.9642

## Sheet: Figure 2G_
				Number of spermatozoa
	Epididimydes			per epididymis
	8 Hsf2bp +/+			Hsf2bp +/+	Hsf2bp S167L/S167L
	8 Hsf2bp S167L/S167L		Epid 1	4908333	2991667
			Epid 2	4991667	3208333
			Epid 3	5255556	2844444
			Epid 4	4111111	2688889
			Epid 5	4025000	5491667
			Epid 6	4166667	2783333
			Epid 7	3177778	3544444
			Epid 8	3577778	2633333
			Mean	4.27674e+06	3.27326e+06
			SD	723809	945160

## Sheet: Figure 3A_
			HSF2BP foci per spermatocyte							HSF2BP intensity (a.u.) on each spermatocyte
			Zygotene			Early pachytene				Zygotene			Early pachytene
	Mice		Hsf2bp +/+	Hsf2bp S167L/S167L		Hsf2bp +/+	Hsf2bp S167L/S167L			Hsf2bp +/+	Hsf2bp S167L/S167L		Hsf2bp +/+	Hsf2bp S167L/S167L
	2 Hsf2bp +/+		161	44		150	55			0.700192	0.234994		0.665	0.191
	2 Hsf2bp S167L/S167L		183	108		122	26			0.709451	0.278416		0.507	0.213
			198	78		149	50			0.705619	0.152937		0.917	0.112
			201	124		123	67			0.798851	0.135377		0.438	0.128
			201	116		111	59			0.620051	0.532886		0.278	0.191
			215	92		138	68			0.548851	0.386654		0.252	0.471
			177	150		121	77			0.632184	0.197637		0.492	0.305
			183	90		105	63			0.727331	0.171775		0.53	0.196
			196	105		106	33			0.607599	0.11622		0.375	0.27
			188	85		142	19			0.615581	0.196679		0.554	0.344
			202	95		159	47			1	0.392401		0.358	0.182
			151	115		146	52			0.391762	0.538633		0.204	0.016
			157	135		135	56			0.459451	0.37516		0.375	0
			158	101		140	66			0.433269	0.0322478		0.404	0.298
			202	91		110	73			0.251277	0.259579		0.271	0.544
			209	115		103	39			0.669211	0.0384505		0.305	0.03
			213	170		104	70			0.651642	0.25		0.365	0.132
			181	149		148	88			0.721198	0.349366		0.512	0.277
			262	132		122	60			0.646457	0.358727		0.345	0.064
			193	83		126	63			0.722206	0.078485		0.39	0.309
			181	153		139	29			0.514833	0.238767		0.328485	0.0650922
			221	131		163	23			0.84519	0.193116		0.43174	0.0236175
			259	115		176	14			0.729119	0.324165		0.406106	0.0738767
			215	65		144	47			1	0.156106		0.413162	0.169643
			232	72		170	62			0.393865	0.165467		0.514401	0.0884217
			196	133		159	73			0.594182	0.0858295		0.50072	0.0793491
			183	131		134	61			0.604119	0.112183		0.303427	0.0914459
			249	143		147	50			0.71155	0.0689804		0.338854	0.015121
			189	119		159	45			0.466014	0.0892857		0.436924	0.0120968
			184	141		141	21			0.544499	0.140409		0.229695	0.0829493
		Mean	198	112.7		143	77		Mean	0.633852	0.221698		0.237327	0.198733
		SD	27.5681	29.3212		142	75		SD	0.165126	0.135426		0.270593	0.178859
						121	50						0.31106	0.0597638
						154	30						0.179291	0.0720046
						124	44						0.278226	0.0697005
						138	61						0.233151	0.112183
						144	86						0.483727	0.0377304
						161	92						0.391993	0.0884217
						154	43						0.253168	0.1178
						155	81						0.30602	0.0381624
					Mean	138.2	54.875					Mean	0.384627	0.148699
					SD	19.0036	20.0489					SD	0.139944	0.125176

## Sheet: Figure 3B_
		HSF2BP foci per oocyte								HSF2BP intensity (a.u.) on each oocyte
		Zygotene				Pachytene				Zygotene				Pachytene
Mice (17.5 dpc embryos)		Hsf2bp +/+	Hsf2bp S167L/S167L			Hsf2bp +/+	Hsf2bp S167L/S167L			Hsf2bp +/+	Hsf2bp S167L/S167L			Hsf2bp +/+	Hsf2bp S167L/S167L
2 Hsf2bp +/+		263	195			231	105			0.412	0.267			0.366	0.029
2 Hsf2bp S167L/S167L		196	240			245	24			0.412	0.297			0.463	0.008
		270	177			315	45			0.923	0.186			0.53	0
		155	185			150	119			0.394	0.182			0.127	0.095
		197	232			128	17			0.136	0.407			0.193	0
		247	172			284	170			0.277	0.109			0.385	0.088
		260	163			200	171			0.593	0.076			0.328	0.197
		278	220			194	157			0.47	0.215			0.54	0.062
		310	235			187	85			0.638	0.257			0.444	0.043
		240	265			199	127			0.591	0.256			0.246	0.1
		281	273			220	112			0.658	0.425			0.519	0.084
		267	161			201	146			0.601	0.092			0.193	0.219
		274	177			211	137			0.421	0.211			0.571	0.099
		264	180			105	133			0.373	0.197			0.255	0.17
		296	231			243	185			0.386	0.061			0.524	0.194
		213	188			251	31			0.395	0.057			0.755	0.018
		275	162			245	120			0.626	0.084			0.375	0.151
		257	273			237	153			0.971	0.431			0.321	0.132
		279	185			256	42			1	0.267			0.434	0.025
		263	174			213	133			0.51	0.019			0.339	0.12
		369	253			227	158			0.598	0.415			0.391	0.306
		301	241			245	132			0.234	0.279			0.546	0.271
		423	135			292	135			0.673	0.377			0.649	0.283
		329	172			174	181			0.734	0.398			0.163	0.274
		229	215			197	214			0.785	0.432			0.297	0.176
		276	319			164	134			0.379	0.796			0.223	0.08
		304	305			253	151			0.653	1			0.557	0.398
		287	297			153	163			0.792	0.358			0.415	0.212
		323	233			172	99			0.849	0.267			0.362	0.199
		316	213			149	173			0.396	0.232			0.423	0.127
		269	127			221	133			0.725	0.205			0.59	0.098
		301	231			284	127			0.829	0.375			0.892	0.255
		408	253			270	142			1	0.627			0.988	0.067
		395	279			132	180			0.741	0.337			0.425	0.462
		411	212			263	184			0.704	0.291			0.396	0.301
		243	237			317				0.555	0.43			0.763	0.241
		270	259			291				0.507	0.37			0.637
		231	281		Mean	219.432	129.086			0.062	0.302		Mean	0.449324	0.155111
			264		SD	53.3446	48.5801				0.582		SD	0.195882	0.113755
	Mean	283.421	220.872						Mean	0.579026	0.312026
	SD	58.8997	47.9974						SD	0.230305	0.197685

## Sheet: Figure 3C_
	Mice (13 dpp)			HSF2BP detection (%)
	2 Hsf2bp +/+			Hsf2bp +/+	Hsf2bp S167L/S167L
	2 Hsf2bp S167L/S167L		Mice 1	100	39.15
			Mice 2	100	30.4
			Mean	100	34.775
			SD	0	6.18718

## Sheet: Figure 4A_
			% of pachytenes with
Mice	Pachynemas		γH2AX accumulation
3 Hsf2bp +/+	364 Hsf2bp +/+		Hsf2bp +/+	Hsf2bp S167L/S167L
3 Hsf2bp S167L/S167L	376 Hsf2bp S167L/S167L	Mice 1	7.24	79.74
		Mice 2	10.78	82.18
		Mice 3	9.09	77.05
		Mean	9.03667	79.6567
		SD	1.7706	2.56602
			γH2AX intensity (a.u.) on each spermatocyte
			Early pachytene			Mid pachytene
	Mice		Hsf2bp +/+	Hsf2bp S167L/S167L		Hsf2bp +/+	Hsf2bp S167L/S167L
	3 Hsf2bp +/+		0.0331809	0.202482		0.108638	0.579583
	3 Hsf2bp S167L/S167L		0.0357936	0.482822		0.0753841	0.392284
			0.401568	0.229393		0.0575623	0.23858
			0.212671	0.192685		0.0268351	0.421168
			0.0619203	0.295754		0.0456128	0.138955
			0.564729	0.41437		0.108569	0.673609
			0.496016	0.837231		0.0511437	0.0938887
			0.17518	0.251339		0.0659611	0.27477
			0.334161	0.526323		0.087197	0.267327
			0.0557805	0.460483		0.0772277	0.317856
			0.645591	0.319791		0.0277911	0.578286
			0.0346179	0.633312		0.0325026	0.454148
			0.383671	0.279164		0.0351656	0.197405
			0.14017	0.253429		0.1817	0.456128
			0.14644	0.424167		0.0482759	0.473745
			0.0979752	0.475506		0.0952544	0.463161
			0.0717178	0.268975		0.150085	1
			0.498628	0.165905		0.092523	0.107545
			0.0416721	0.116786		0.0850119	0.143872
			0.345787	0.359504		0.102219	0.25411
			0.0168517	0.883605		0.052776	0.136381
			0.196604	0.215023		0.0151535	0.499412
			0.321489	0.258001		0.0613978	0.609406
			0.0250816	0.218289		0.0930111	0.74435
			0.0543436	0.156891		0.0560418	1
			0.226911	0.168648		0.102809	0.254735
			0.69693	0.229131		0.123841	0.264794
			0.145134	0.386414		0.226649	0.126453
			0.619073	0.215153		0.21855	0.125278
			0.106597	0.268452		0.151796	0.251992
			0.290398	0.23492		0.130895	0.265186
			0.41878	0.116244		0.0675376	0.114696
			0.158157	0.113581		0.124886	0.25983
			1	0.0710895		0.0749837	0.221816
			0.752113	0.103624		0.145395	0.0701502
			0.498321	0.849022		0.119268	0.0765513
			0.603913	0.586778		0.120183	0.0549967
			0.271622	0.466018		0.107511	0.126192
			0.171935	0.323955		0.430699	0.186022
			0.144726	0.363552		0.0755062	0.209798
			0.248119	0.197291		0.137316	0.323955
			0.134422	0.640616		0.113234	0.0907723
			0.0455019	0.201806		0.171819	0.238277
			0.120296	0.423064		0.478986	0.106055
			0.133032	0.45363		0.17946	0.300567
			0.168809	0.250782		0.34769	0.353016
			0.0948246	0.25275		0.237814	0.165219
			0.122844	0.847285		0.223573	0.29802
			0.122959	0.355911		0.063448	0.261086
			0.201922	0.350122		0.135232	0.969781
			0.533634	0.154915		0.189302	0.61005
			0.240014	0.929605		0.0834781	0.379183
			0.106866	0.274748		0.087762	0.376867
		Mean	0.259802	0.35378		0.0626375	0.849601
		SD	0.223578	0.214864		0.037513	0.114855
						0.0678476	0.435105
						0.0237351	0.400255
						0	0.617228
						0.142063	0.979854
						0.0825518	0.781058
					Mean	0.115317	0.362921
					SD	0.0899157	0.254501

## Sheet: Figure 4B_
			RPA1 foci per spermatocyte
			Leptotene					Late zygotene/Zygotene-like					Early pachytene			Mid pachytene
	Mice		Hsf2bp +/+	Hsf2bp S167L/S167L	Hsf2bp -/-			Hsf2bp +/+	Hsf2bp S167L/S167L	Hsf2bp -/-			Hsf2bp +/+	Hsf2bp S167L/S167L		Hsf2bp +/+	Hsf2bp S167L/S167L
	3 Hsf2bp +/+		3	97	100			150	209	175			64	140		8	89
	3 Hsf2bp S167L/S167L		15	55	90			156	160	235			66	119		8	52
	3 Hsf2bp -/-		157	57	97			162	191	253			66	95		10	51
			28	8	87			163	159	190			90	141		10	99
			124	102	107			170	201	226			95	139		12	97
			46	81	72			178	173	255			98	144		14	60
			43	67	63			183	169	241			100	128		15	66
			11	43	46			187	265	195			106	112		15	32
			16	6	27			202	224	220			106	124		16	61
			18	17	106			254	185	228			124	136		16	57
			87	54	5			225	198	230			131	118		16	64
			43	69	0			224	233	200			137	96		18	84
			19	49	0			233	209	185			139	129		18	55
			51	119	7			184	173	230			139	135		22	77
			18	90	18			213	184	170			143	117		23	84
			10	10	53			189	201	247			210	160		24	82
			35	41	60			203	226	190			120	113		25	78
			5	74	50			169	171	164			113	138		29	84
			48	102	48			148	195	166			161	177		32	75
			33	46	38			189	207	184			118	150		32	58
			27	37	58			185	185	176			120	162		34	76
			19	27	60			184	162	197			144	189		35	68
			24	29	56			178	182	210			71	134		42	67
			60	96	37			212	192	232			103	161		47	28
			42	114	14			201	187	209			165	121		55	101
			82	89	20			215	197	213			115	130		78	47
			28	60	80			243	170	183			162	163		99	69
			15	34	64			227	178	240			94	126		0	44
			83	109	73			211	188	218			127	155		29	83
			58	11	81					237			96	157		28	22
			96	43	57					197			108	112		33	75
				38	62					242			80	130		131	77
				20	68					238			137	132		50	91
				33	49					243		Mean	116.606	135.848		20	119
					92					190		SD	32.2654	21.522		36	19
					97					241						3	152
					85					236						17	102
		Mean	43.3548	56.6765	57.4865		Mean	194.414	192.207	213.135						24	22
		SD	36.1105	33.4335	30.8262		SD	27.8843	23.8393	27.1786						17	58
																14	50
																50	80
																30	102
																2	67
																18	48
																22	91
																26	95
																19	82
															Mean	28.1277	71.0638
															SD	23.9543	25.9769

## Sheet: Figure 4C_
			γH2AX intensity (a.u.)
			on each oocyte
	Mice (17.5 dpc embryos)		Hsf2bp +/+	Hsf2bp S167L/S167L	Hsf2bp -/-
	2 Hsf2bp +/+		0.21	0.141	0.414
	2 Hsf2bp S167L/S167L		0.147	0.308	0.441
	2 Hsf2bp -/-		0.121	0.144	0.52
			0.083	0.082	0.442
			0.09	0.552	0.471
			0.372	0.086	0.334
			0.109	0.255	0.493
			0.149	0.111	0.765
			0.066	0.254	0.479
			0.124	0.092	0.486
			0.157	0.16	0.296
			0.056	0.484	0.779
			0.105	0.294	1
			0.139	0.113	0.575
			0.071	0.216	0.375
			0.062	0.204	0.474
			0.061	0.225	0.497
			0.16	0.084	0.531
			0.244	0.126	0.362
			0.112	0.293
			0.109
		Mean	0.13081	0.2112	0.512316
		SD	0.073655	0.129627	0.17037

[truncated: 36 more sheets: Figure 4D_, Figure 5A_, Figure 5B_, Figure 5C_, Figure 5D_, Figure 6A_, Figure 6B_, Figure 6C_, Figure 6D_, Figure 7F_, Figure 7G_, Figure 7H_, Figure 8A_, Figure 8F_, Figure 8H_, Figure 9A_, Figure 9B_, Figure 9C_, Figure 9D_, Figure 9E_ …]
