# Supplementary material for: A missense in HSF2BP causing primary ovarian insufficiency affects meiotic recombination by its novel interactor C19ORF57/BRME1
Source: eLife journal article supplement (doi:10.7554/elife.56996), 2020-08-26
Supplement: supp [file elife-56996-supp-v1.zip]

***Spo11*<sup>-/-</sup>**

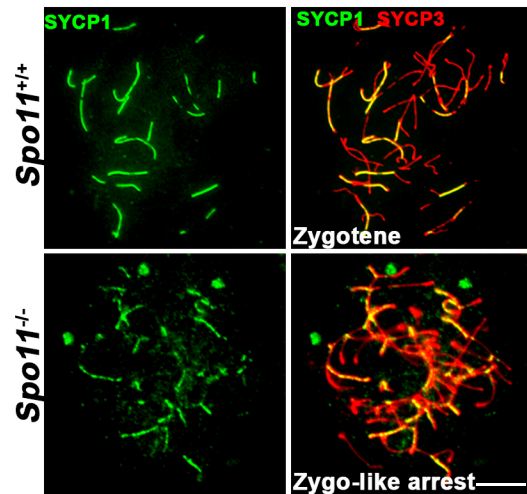

| BRME1                                                                                 | BRME1<br>SYCP3                                                                        |
|---------------------------------------------------------------------------------------|---------------------------------------------------------------------------------------|
| 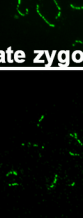   |    |
| <b>Late zygotene</b>                                                                  |                                                                                       |
|    |    |
| <b>Zygo-like arrest</b>                                                               |                                                                                       |
|    |    |
| <b>Zygo-like arrest</b>                                                               |                                                                                       |
|   |   |
| <b>Late zygotene</b>                                                                  |                                                                                       |
|  |  |
| <b>Late zygotene</b>                                                                  |                                                                                       |
|  |  |
| <b>Late zygotene</b>                                                                  |                                                                                       |
|  |  |
| <b>Zygo-like arrest</b>                                                               |                                                                                       |

**♂**  
**WT**

***Rec8<sup>-/-</sup>***

## Six6os1<sup>-/-</sup>

***Rnf212<sup>-/-</sup>***

***Hei10<sup>-/-</sup>***

***Psma8<sup>-/-</sup>***

***Spo11*<sup>-/-</sup>**

|               | HSF2BP                                                                                | HSF2BP<br>SYCP3                                                                       |
|---------------|---------------------------------------------------------------------------------------|---------------------------------------------------------------------------------------|
|               | 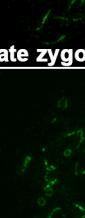   |    |
|               |    |    |
| <i>hsc1-1</i> |    |    |
|               |   |   |
| <i>hsc1-2</i> |  |  |
|               |  |  |
| <i>hsc1-3</i> |  |  |
