# Supplementary material for: A missense in HSF2BP causing primary ovarian insufficiency affects meiotic recombination by its novel interactor C19ORF57/BRME1
Source: eLife journal article supplement (doi:10.7554/elife.56996), 2020-08-26
Supplement: supp [file elife-56996-supp-v1.zip]

## Felipe-Medina\_ Figure 1\_Figure supplement 2

ENSP00000291560 Hsap/1-334

ENSTTRP00000000680\_Ttru/1-334  
 ENSGGOP00000029257\_Ggor/1-339  
 ENSPPYP00000012806\_Pabe/1-326  
 ENSMFA00000037975\_Mfas/1-334  
 ENSMAUP00000020636\_Maur/1-344  
 ENSAMEP00000011987\_Amel/1-334  
 ENSSARP00000010935\_Sara/1-237  
 ENSDORP00000027761\_Dord/1-337  
 ENSHGLP00000012308\_Hgfe/1-336  
 ENSTSY000000000982\_Csyr/1-334  
 ENSCWAP00000028492\_Cwag/1-334  
 ENSPEMP00000025118\_Pmba/1-338  
 ENSOGAP00000008822\_Ogar/1-334  
 ENSSSUP00005002765\_Ssur/1-367  
 ENSSBOP00000029851\_Sbbo/1-334  
 ENSCCAP00000027862\_Ccap/1-331  
 ENSCANP00000035144\_Capa/1-334  
 ENSPVAP00000009392\_Pvam/1-322  
 ENNSTOP00000010567\_Itri/1-334  
 ENSBIXP0000005017111\_Bihy/1-334  
 ENSOCUP00000008291\_Ocun/1-285  
 ENSETEP00000013339\_Etel/1-253  
 ENSDNOP00000003033\_Dnov/1-321  
 ENSAFP00030042050\_Clfa/1-334  
 ENSBGRP00000033394\_Bgru/1-380  
 ENSBIXP00000043346\_Bthy/1-334  
 ENSVURP00010030416\_Vurs/1-338  
 ENSSHAP00000020791\_Shar/1-323  
 ENSCGRP00015029988\_Cgpi/1-375  
 ENSPTIP00000018380\_Ptal/1-325  
 ENSHGLP00100007014\_Hgma/1-336  
 ENSTTRP00000024023\_Ptro/1-334  
 ENSPSMP00000001155\_Psim/1-334  
 ENSCATP00000038233\_Caty/1-334  
 ENSPPRP00000018732\_Ppar/1-334  
 ENSRROR00000017466\_Rrox/1-305  
 ENSSDAP00000017273\_Sdau/1-335  
 ENSJJAP000000007064\_Jjac/1-272  
 ENSRNOR00000001580\_Rnor/1-338  
 ENSCDRP000000518641\_Cdro/1-334  
 ENSCLAP00000009399\_Clan/1-334  
 ENSPPAP00000023666\_Ppan/1-334  
 ENSFDAP00000004802\_Fdam/1-334  
 ENSMLUP000000007048\_Mluc/1-338  
 ENSMOC00000006501\_Moch/1-339  
 ENSLCNP00005011741\_Lcan/1-334  
 ENSMSIP00000014116\_Mspi/1-338  
 ENSODEP00000015972\_Odeg/1-338  
 ENSMICP00000004266\_Mmur/1-334  
 ENSOARP00000012082\_Oari/1-334  
 MGP\_PahariEiJ\_P0056165\_Mpah/1-140  
 ENSSEAP00005002169\_Eaas/1-365  
 ENSMUGP00000008716\_Mung/1-338  
 ENSCGRP00001003313\_Cgch/1-344  
 ENSCJAP00000006790\_Cjac/1-330  
 ENSRBIP00000022948\_Rbie/1-294  
 ENSTBEP00000000217\_Tbel/1-322  
 ENSCAPP00000016811\_Cape/1-330  
 ENSMPUP00000009697\_Mpfu/1-271  
 ENSNLEP000000043894\_Nleu/1-334  
 ENSNVIP00000008731\_Nvis/1-378  
 ENSCSAP00000004229\_Csab/1-334  
 ENSUMAP000000035491\_Umar/1-323  
 ENSCGRP00001023249\_Cgch/1-344  
 ENSPCOP00000007770\_Pcoq/1-334  
 ENSCAFP00040020861\_Clfa/1-395  
 ENSPTCP00005020625\_Pcat/1-334  
 ENSMSP00000014742\_Mmos/1-334  
 MGP\_CAROLIEiJ\_P0043868\_Mcar/1-140  
 ENSPTFP00000011398\_Ptep/1-324  
 ENSNGAP00000002756\_Ngal/1-336  
 ENSBTAP00000023149\_Btau/1-334  
 ENSMUSP00000157466\_Mmus/1-338  
 ENSRFEP000010000301\_Rfer/1-335  
 ENSPCIP000000020369\_Pcin/1-341  
 ENSCHIP000000002348\_Chir/1-338

ILGGDKALKFFSITGQTMESFVKSLDGDVQ---ELDSDESQFVFALAGIVTNVAA

[illegible]

ENSCCNP00000021165\_Ccan/1-336  
MGP\_SPRETE1j\_P0045780\_Mspr/1-338  
ENSFCAP00000051155\_Fcat/1-334  
ENSECAP00000028432\_Ecab/1-334  
ENSLAFP00000000645\_Lafr/1-192  
ENSCAFP00020024009\_Cldi/1-329  
ENSMLEP00000036425\_Mleu/1-326  
ENSCAFP00000015614\_Cfam/1-334  
ENSUPAP00010003977\_Upar/1-334  
ENSUVUP00000033914\_Vvul/1-416  
ENSMMP00000012516\_Mmma/1-322  
ENSCGRP00000008257\_Cgcr/1-344  
ENSBMUP00000016891\_Bmut/1-374  
ENSPANP00000012834\_Panu/1-334  
ENSMNEP00000030151\_Mnem/1-299  
ENSANAP00000039687\_Anan/1-334  
ENSBBP000000006093\_Bbbi/1-334  
ENSTGEP00000025068\_Tgel/1-334  
ENSMMP000000051879\_Mmul/1-334  
ENSCPOP00000002177\_Cpor/1-333  
ENSMODP00000026301\_Mdom/1-338  
ENSOANP00000010330\_Oana/1-336
