# Supplementary material for: A missense in HSF2BP causing primary ovarian insufficiency affects meiotic recombination by its novel interactor C19ORF57/BRME1
Source: eLife journal article supplement (doi:10.7554/elife.56996), 2020-08-26

POI-affected twin III-1

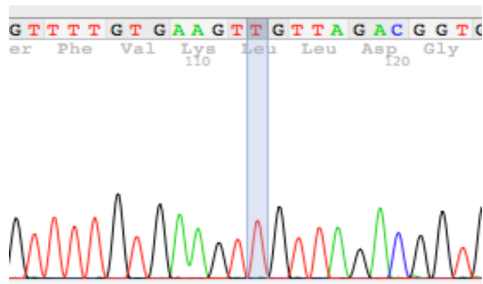

Mother II-2

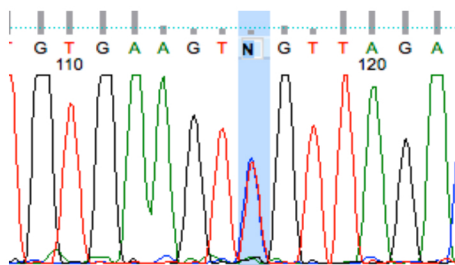

Father II-1

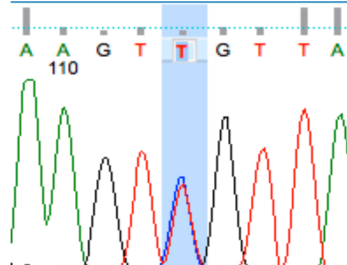

Fertile sister III-6

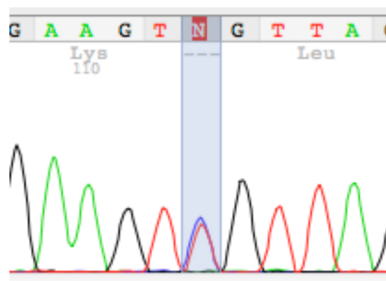

Fertile sister III-10

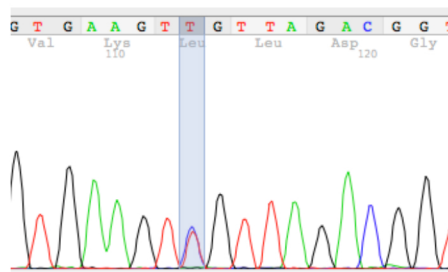

Fertile brother III-7

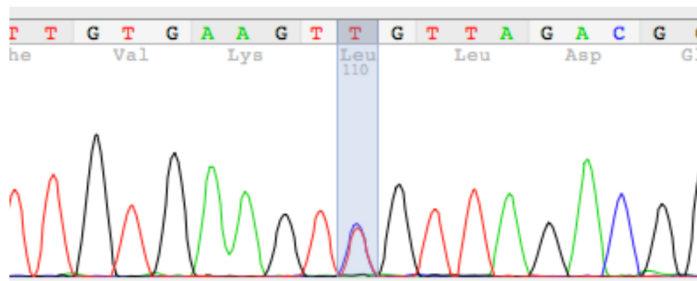

Supplement: supp [file elife-56996-supp-v1.zip]
