# Supplementary material for: A missense in HSF2BP causing primary ovarian insufficiency affects meiotic recombination by its novel interactor C19ORF57/BRME1
Source: eLife journal article supplement (doi:10.7554/elife.56996), 2020-08-26
Supplement: supp [file elife-56996-supp-v1.zip]

ENSP00000291560\_Hsap/1-334

ENSGAGP00000000454\_Gaga/1-336  
 ENSNCEP00000018733\_Ccae/1-336  
 ENSNMPE0000001616\_Nmel/1-382  
 ENSSCAP00000015316\_Scan/1-347  
 ENSLCOP00000002986\_Lcor/1-336  
 ENSMUNP00000011578\_Mund/1-361  
 ENSCUPP00000017770\_Cpug/1-301  
 ENSEGOP00005008603\_Egou/1-335  
 ENSSHBP00005011292\_Shah/1-301  
 ENSPCLP00000008530\_Pcol/1-336  
 ENSACAP00000017574\_Acar/1-301  
 ENSPTXP00000015356\_Ptex/1-337  
 ENSARWP00000026189\_Arow/1-329  
 ENSCPBP00000017720\_Cpbe/1-342  
 ENSACOP00000010942\_Acol/1-326  
 ENSFALP00000002102\_Falb/1-336  
 ENSSMRP00000029796\_Smer/1-301  
 ENSNPEP00000012775\_Nper/1-329  
 ENSAPLP00000003727\_Appl/1-336  
 ENSLSDP00000011344\_Lsdo/1-339  
 ENSSPUP00000023120\_Spun/1-327  
 ENSNSUP00000000979\_Nscu/1-335  
 ENSPMJP00000014199\_Pmaj/1-336  
 ENSPVIP00000026890\_Pvit/1-301  
 ENSCPIP00010010640\_Cpic/1-340  
 ENSACBP00000014577\_Cabi/1-327  
 ENSAHAP00000003935\_Ahaa/1-311  
 ENSCJPP0000500998\_Cjap/1-363  
 ENSMVIP00005009255\_Mvit/1-336  
 ENSPSIP00000008390\_Psin/1-322  
 ENSMGAP00000015454\_Mgal/1-322  
 ENSABRP00000017191\_Abra/1-306  
 ENSPMRP00000034335\_Pmur/1-345  
 ENSDNVP00000009224\_Dnov/1-334  
 ENSACCP0020000703\_Acch/1-340  
 ENSJHYP00000017704\_Jhye/1-409  
 ENSSCUP00000016503\_Scau/1-336  
 ENSACUP00000019635\_Acun/1-326  
 ENSAOWP00000021620\_Aowe/1-337  
 ENSACDP00005009735\_Acyg/1-306  
 ENSCPGP00000014458\_Cpyg/1-336  
 ENSTGUP00000006085\_Tgut/1-335  
 ENSPSTP00000012794\_Pcri/1-320  
 ENSZALP00000002189\_Zalb/1-301  
 ENSVKKP00000020715\_Vkom/1-321  
 ENSANIP00000018222\_Anis/1-336  
 ENSGALP00000026071\_Ggal/1-336  
 ENSCRPP00005023694\_Cpor/1-306

ENSPHSA00000291560\_Hsap/1-334

ENSOABP00000040411\_Oaur/1-343  
 ENSGAFP00000024427\_Gaff/1-336  
 ENSMMOP00000005954\_Mmol/1-304  
 ENSGACP00000020225\_Gacu/1-322  
 ENSPKIP00000027491\_Pkin/1-344  
 ENSISORP00005023028\_Sorb/1-309  
 ENSIPUP00000020465\_Ipun/1-350  
 ENSELUP00000033600\_Eluc/1-369  
 ENSORLP00020013137\_Olhn/1-355  
 ENSFHEP00000033032\_Fhet/1-335  
 ENSMAP00000016094\_Smax/1-348  
 ENSPNYP00000029528\_Pnye/1-356  
 ENSLCAP000010015134\_Lcal/1-361  
 ENSKMAP000000016215\_Kmar/1-321  
 ENSATEP00000017112\_Ates/1-324  
 ENSMZEP00005025586\_Mzeb/1-341  
 ENSXCOP00000027267\_Xcou/1-294  
 ENSONIP00000004724\_Onil/1-322  
 ENSPMEP00000022553\_Pmex/1-346  
 ENSLCRP0000005033625\_Lcro/1-383  
 ENSTRUP000000056411\_Trub/1-394  
 ENSGMOP00000002425\_Gmor/1-311  
 ENSXMAP00000030843\_Xmac/1-338  
 ENSPNAP00000012466\_Pnat/1-349  
 ENSAACP00000007621\_Aoce/1-327

ILGGDKALKFFSITGQTMESFVKSLDGDV--QELDSDESQFVFALAGIVTNVAA

[illegible]

ILGGD-KALKFFSITGQTMESFV-KSLDGDV----QELDSDESQFVFALAGIVT-NVAA

WLADG-KLQAF LAVAAQTLESFV-TSLDEEEKTQTEDYNSHEHQFVLAVAGTIT-NVAA  
WLADG-KLPSFLTVA AQTLESFV-KSMDD EIKTQPGDHNSQEHQFVLALVGTIT-NIAA  
WL--G-KLQSFLEVA AQTLESFV-ASLDQEVKNLTEDHNSQEHQFVLALAGTIT-NIAA  
WLTD A-KLQSF LQVAAQTLESFV-GSLDD DANTLAEDHNP-DHQFVLAWLEPLLSDVAA  
ILAGS-YIEFFLALAGQTLESFV-SSLN-PVKMEKEDSSCQEHQFVLAVAGIT-NIAA  
---G-KLRFSVAVAAQTLESFV-RSLDEDAKTQEDDSEEHQFVLALAGIT-NIAA  
VLADG-KLEFFLSVAGQTLESFV-KSLDEEEKPQQQYNNSHEHQFVLALAGVIT-NLAA  
ILVEG-NLQSF LSMAGQ ILESYV-KSLDGEARAEQQDSNSHEQQFVLALAGVVT-NVAA  
WLADG-KLLSFVSVSAQTLESFV-KSLDEEVKQDSDYNSHEHQFVLALVGTVT-NVAA  
WLADG-KLPSFLTVA AQTLESFV-KSMDEEMKT---E EPGSHEHQFVLALAGTIT-NVAA  
WLADG-KLQSF LVA AQTLESFV-GSLDAEVKNLTEDHNSQEHQFVLALAGTIT-NIAA  
WL--G-KLQAF LAVAAQTLESFV-TSLDEEEKSQTEDYNSHEHQFVLAVAGTIT-NVAA  
WLQ-G-KLQSF LTVAGQTLESFV-RSLDSEVKTQTEDHNSQEHQFVLALVGTIT-NIAA  
WL--G-KLQSF LVIATVQTLESFV-KSLDDEMKTQTEDPNSTEHQFVLALVGTIT-NIAA  
WL--G-KLKSFLTVA AQTLESFV-GSLDEEVKTQSEDLNSQEHQFVLALAGTIT-NIAA  
WLADG-KLQFLAVAAQTLESFV-TSLDEEEKSQTEDYNSHEHQFVLAVAGTIT-NVAA  
WL--G-KLPSFLTVA AQTLESFV-KSMDD EIKTQPGDHNSQEHQFVLALVGTIT-NIAA  
WL--G-KLQAF LAVAAQTLESFV-TSLDEEEKTQTEDYNSHEHQFVLAVAGTIT-NVAA  
WLADG-KLASFLTVA AQTLESFV-KSMDD EIKTQPGDHNSQEHQFVLALVGTIT-NIAA  
WLADG-KLQSF LVLAAQTLESFV-RSLDDEGKAQTEDHNSQEHQFVLALAGTIT-NIAA  
WLADG-MLQPF LVAASQTLESFV-RSLDDEVKTQTEDHSSQEHQFVLALAGTIT-NIAA  
XXXXG-KLPSFLDLAGQTLSQSFV-QSGEDDADL---DQTSTEHQFVLAWLGSQ--DVAA  
WLTDG-KLPSFLTVA AQTLESFV-KSMDD EIKTQPGDHNSQEHQFVLALVGTIT-NIAA  
ILADG-KLEPFLKVA GQTLESFV-KSLDEEEKTPQ-QNYSSEHQFVLALAGIT-NLAA  
WL--G-KLQAF LTVAAQTLESFV-RSLDDEMKTQTEDHNSHEHQFVLALAGTIT-NIAA

ENSHBUP00000021919\_Hbur/1-239  
ENSORLP00015015570\_Olhs/1-379  
ENSTNIP00000017492\_Tnig/1-337  
ENSLOCP00000001492\_Locu/1-342  
ENSPMGP00000019233\_Pmag/1-307  
ENSXPREP00000026460\_Pret/1-339  
ENSMALP00000017207\_Malb/1-332  
ENSMMDP00005003945\_Mmur/1-345  
ENSHCOP00000014782\_Hcom/1-352  
ENSENLP00000003494\_Enau/1-355  
ENSORLP00000025611\_Olat/1-355  
ENSGWIP00000005420\_Gwil/1-365  
ENSPLAP00000024128\_Plat/1-312  
ENSXETP00000025892\_Xtro/1-315  
ENSSLDP00000019834\_Sldo/1-339  
ENSMAMP00000005262\_Marm/1-330  
ENSACLP00000010749\_Acal/1-341  
ENSSPAP00000019130\_Spar/1-336  
ENSAPOP00000016808\_Apol/1-345  
ENSSDUP00000030608\_Sdum/1-354  
ENSACIP00000022763\_Acit/1-312  
ENSPFOP00000000434\_Pfor/1-324  
ENSDARP00000114662\_Drer/1-365  
ENSSFAP00005047030\_Sfas/1-327  
ENSSAUP00010012427\_Saur/1-348  
ENSCVAP00000003098\_Cvar/1-257  
ENSSFOP00015035913\_Sfor/1-362  
ENSDCDP00000028687\_Dclu/1-335  
ENSAMXP00005023676\_Ampa/1-356  
ENSNMLP00000006028\_Nmel/1-345  
ENSOMEPP00000009520\_Omel/1-341  
ENSCHAP00000000583\_Char/1-368  
ENBSLPP00000013271\_Bspl/1-344  
ENSCGOP00000002370\_Cgob/1-345  
ENSAPEP00000012225\_Aper/1-285  
ENSEEEP00000024604\_Eele/1-329  
ENSCSEP00000009624\_Csem/1-343  
ENSLACP00000006144\_Lcha/1-340  
ENSEBUP00000012007\_Ebur/1-327  
ENSPMAP00000009832\_Pmar/1-320

WLADG-KLQAF LAVAAQTLESFV-TSLDEEEKSQTEDYNSHEHQFVLAVAGTIT-NVAA  
WLADG-KLLSFVSVSAQTLESFV-KSLDEEVKQSDDYNSHEHQFVLALVGTVT-NVAA  
WLADG-KLQPFLAVATQTLESFV-TSLDDEVKTQTEDHNSQEHQFVLGLAGTIT-NIAA  
ILAGS-RVQTFFTVAGQTLESFV-KSLDGDGRPGQDLSSDENQFVLALAGVIT-NIAA  
WLSHDHVKLQSFLLVAAQTLESFV-CSLDEDVKVQTEDPNSQEHQFVLALAGTIT-NIAA  
WLADG-KLPCFLTVAQTLESFV-KSMGDEIKTQPGDHNSQEHQFVLALVGTIT-NIAA  
WLADG-KLQAF LAVTAQTLEIFV-KSLDEEVKTQVEDHNCQEHQFVLALARTIT-NIAA  
WVAQG-KLQSFLTVAQTLESFV-KSLDEEVNAQSEDYNTHEHQFVLGLAGVIT-NVAA  
WLADG-SLPAFVAVATQTLESFV-RLLDEDVKTRSEDCDTQEYQFVLALAGTIT-NIAA  
WLADG-FLAIAAQTLESFI-GSLDVELKPQTEDQNSQEHQFVLALAGTIT-NIAA  
WLADG-KLLSFVSVSAQTLESFV-KSLDEEVKQSDDYNSHEHQFVLALVGTVT-NVAA  
WLTDG-KLPSFLTVAQTLESFV-TSLDEETKTQTEDHNSQEHQFVLALAGTIT-NIAA  
WL--G-KLSSFLTVAQTLESFV-KSMDDIKTQPSDHNSQEHQFVLALVGTIT-NIAA  
ILGGS-KAPMFFSLAAQTLESFV-RSLTSE---QPQDEENESHFVLGLAGTIT-NVAA  
WL--G-KLQAF LAVAAQTLESFV-RSLDVELKTQTEDQNSQEHQFVLALAGTIT-NIAA  
WLSDG-KLQSFLGLAAQTLESFV-KSLDDEVKTQIEDHNSQEHQFVLALAGTIT-NIAA  
WLADG-KLQAF LAVAAQTLESFV-TSLDEEEKSQTEDYNSHEHQFVLAVAGTIT-NVAA  
WL--G-KLQSFLTVAQTLESFV-SSLDEEMKTQTEDHNSHEHQFVLALAGTIT-NIAA  
WLADG-KLPSFLTVAQTLESFV-RSLDEDMKTQTEDHNSHEHQFVLALAGTIT-NIAA  
WLADG-KLQAF LAVAAQTLESFV-RSLDVELKTQTEDQNSQEHQFVLALAGTIT-NIAA  
WL--G-KLQAF LAVAAQTLESFV-KSLDEDMTQTDDHNSHELQFVLAVAGTIT-NIAA  
WLADG-KLSSFLTVAQTLESFV-KSMDDIKTQPSDHNSQEHQFVLALVGTITIDIAA  
ILANG-KLEDFLSIAGQTLETFI-KLLVDEAKPQQSD-NSHEHNFVLALAGVVT-NIAA  
W---G-KLPSFLTVAQTLESFV-RSLDEETKTQTEDPSSQEHQFVLALAGSIT-NIAA  
WLADG-KLQSFLSVAAQTLESFV-RSLDEDVKTQTEDHTSQEHQFVLALAGTIT-NIAA  
WLSDG-KLHTFLNIAAQTLESFV-KSLDEEIKPPAEDHSSNENQFVLALVGTIT-NIAA  
ILADR-KAEAF LAVAAQTLESFVGVQSLDREGKVEQQT-SSQEQFVLALAGIVT-NIAA  
ML--G-KLEPFLSLAGQTLESFV-KSLGEEVKPPQVEHNSHEYQFVLALAGFVT-NLAA  
ILADG-KLEPFLSVAGQTLESFV-KSLDEEEKPQQQHYNNSHEHQFVLALAGVIT-NIAA  
WLADQWKLQS FVVVAAQTLESFV-RSLDEDVKVQTEDPNSQEHKQFVLALAGTIT-NIAA  
WLVDG-KLPSFLNVAAQTLESFG-KSLDEEVKQSDYNSQEHQFVLAVAGTIT-NVAA  
ILADG-KLEPFLSVAGQTLESFV-KSLDQDSKLPQQDSNSHEHQFVLALAGVVT-NLAA  
WLADG-KLQSFFCVAAQTLESFV-GSLDEEVKA--EDHNSQEHQFVLALAGTIT-NIAA  
WLADG-KLQTFLSVAAQTLESFV-RSLDEEAKSQTEDHNSQEHQFVLALAGTIT-NVAA  
-----TLESFV-RSLDEDMKTQTEDHNSHEHQFVLALAGTIT-NIAA  
I---G-LFKPFLTVAQTLESFI-KSLDEEETPQQQNYNSHEHQFVLALAGITIT-NVAA  
WLADG-KLPSFLGVAAQTLESFV-DSLDAEVKTQTEDQNSLEHQFVLALAGTIT-NIAA  
ILGGS-KAVKFFT VAGTIESFV-KSLDGDVK-QQQDLSDENQFVMGLTGIVT-NIAA  
ILNGA-KVEEFFTLSTQTLDSFM-KSMIEEGK--RKNIDEENQFVLAMAGTIT-NVAA  
ILVGC-KVKEFFTLASQTVESYV-KSMPGDFK--TEDAGGDESQFVLAMAGIVT-NIAA
