# Supplementary figures and images for: A missense in HSF2BP causing primary ovarian insufficiency affects meiotic recombination by its novel interactor C19ORF57/BRME1
Source: eLife journal article supplement (doi:10.7554/elife.56996), 2020-08-26

**a**

*Brme1*<sup>-/-</sup>

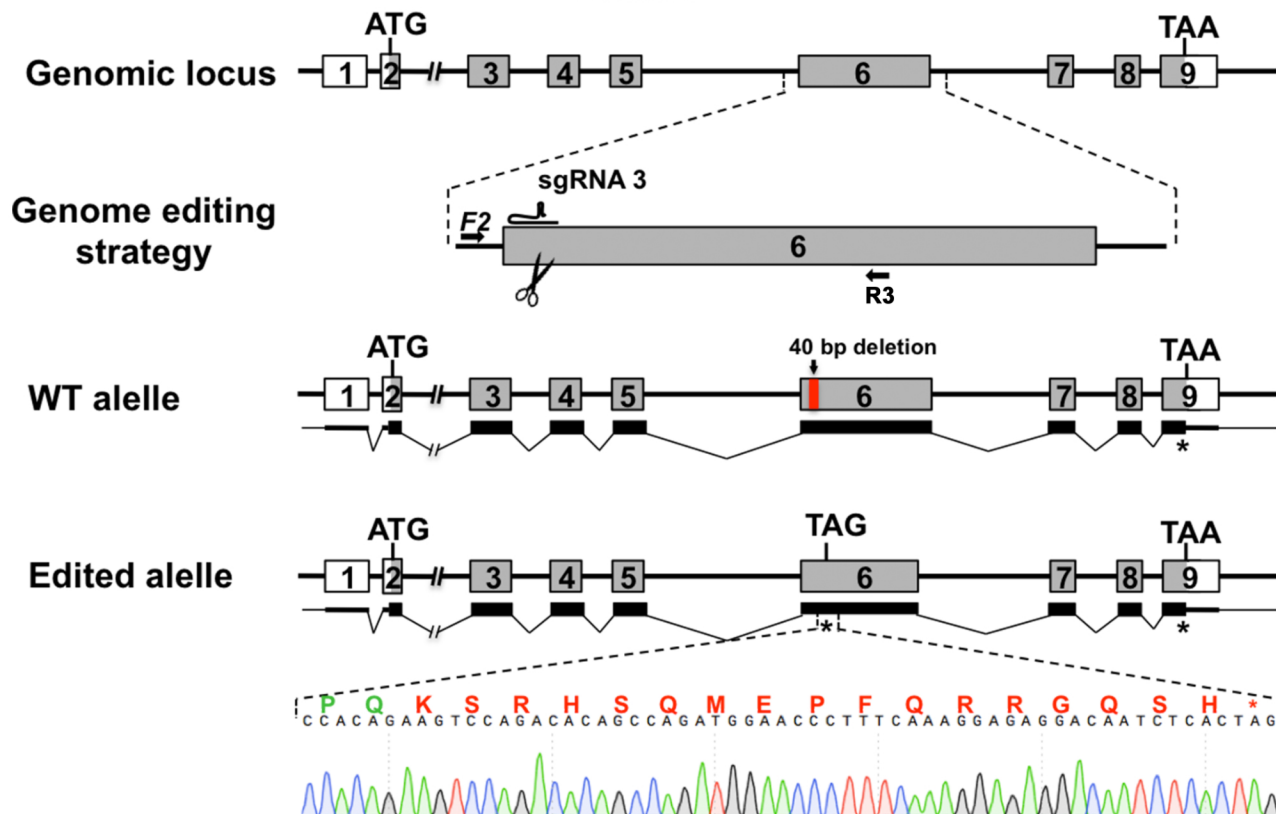

**b**

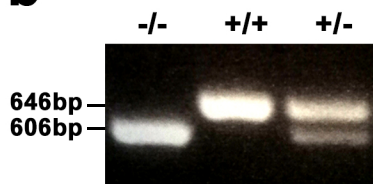

**c**

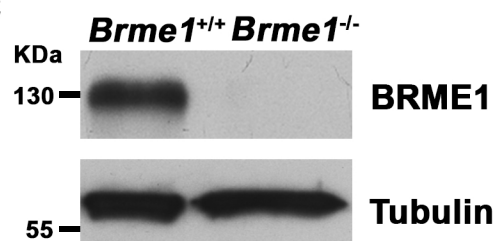

**d**

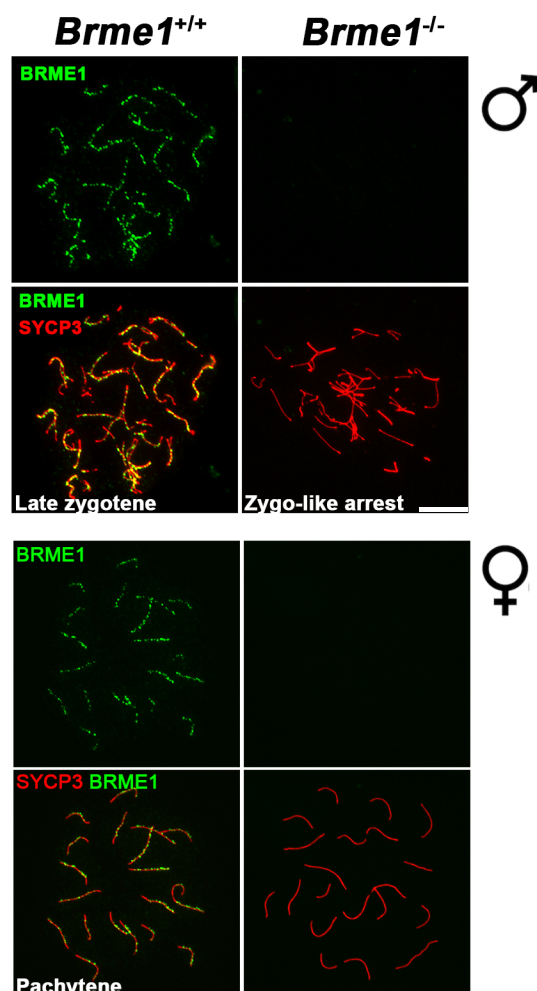

**e**

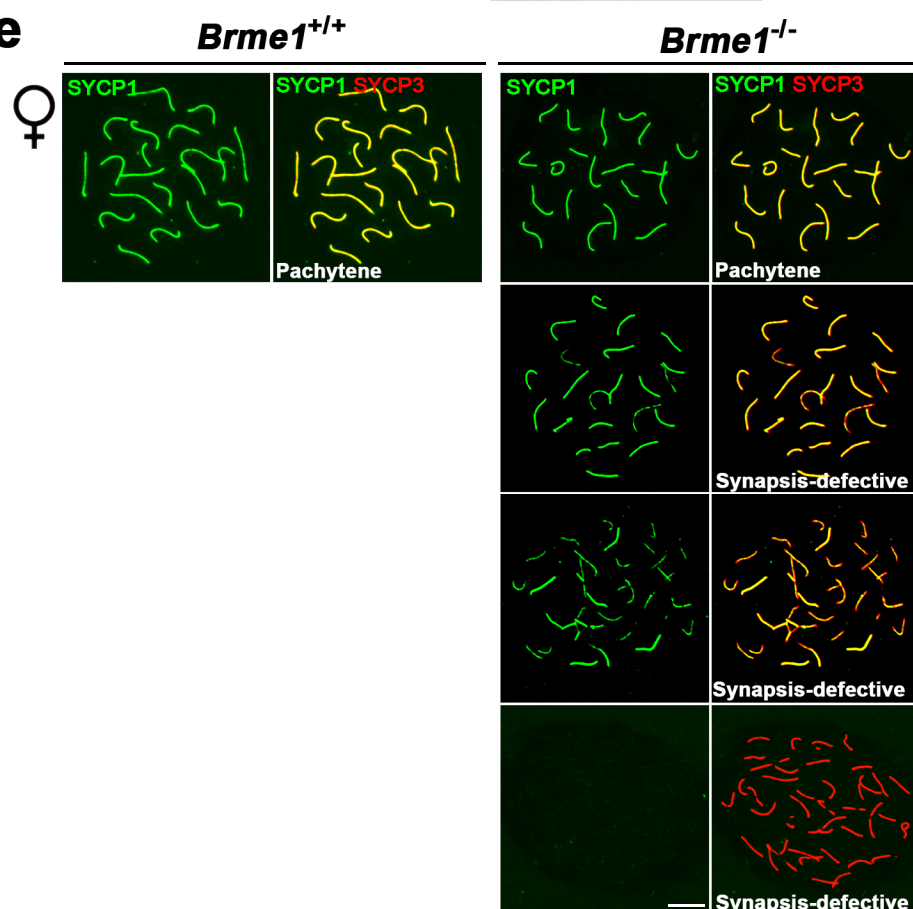

Supplement: supp [file elife-56996-supp-v1.zip]

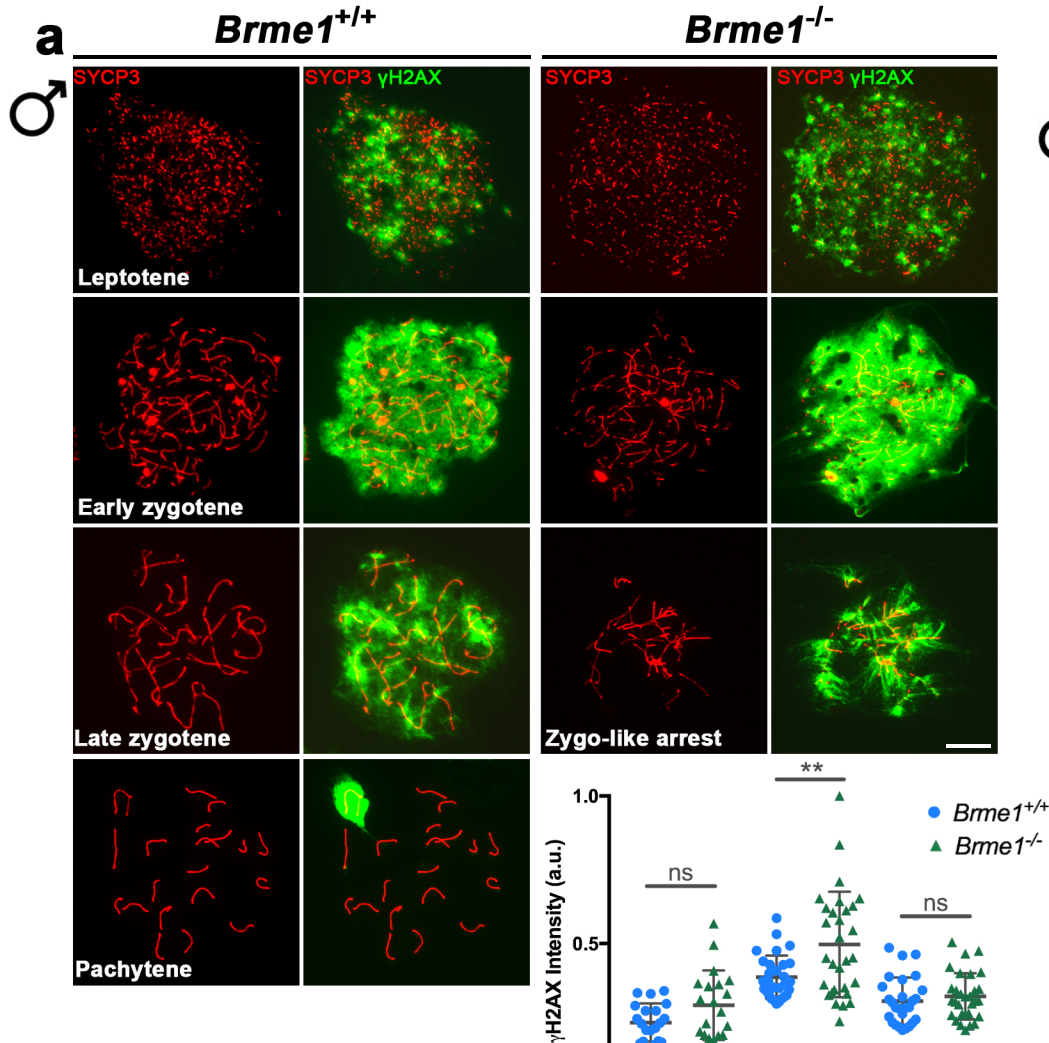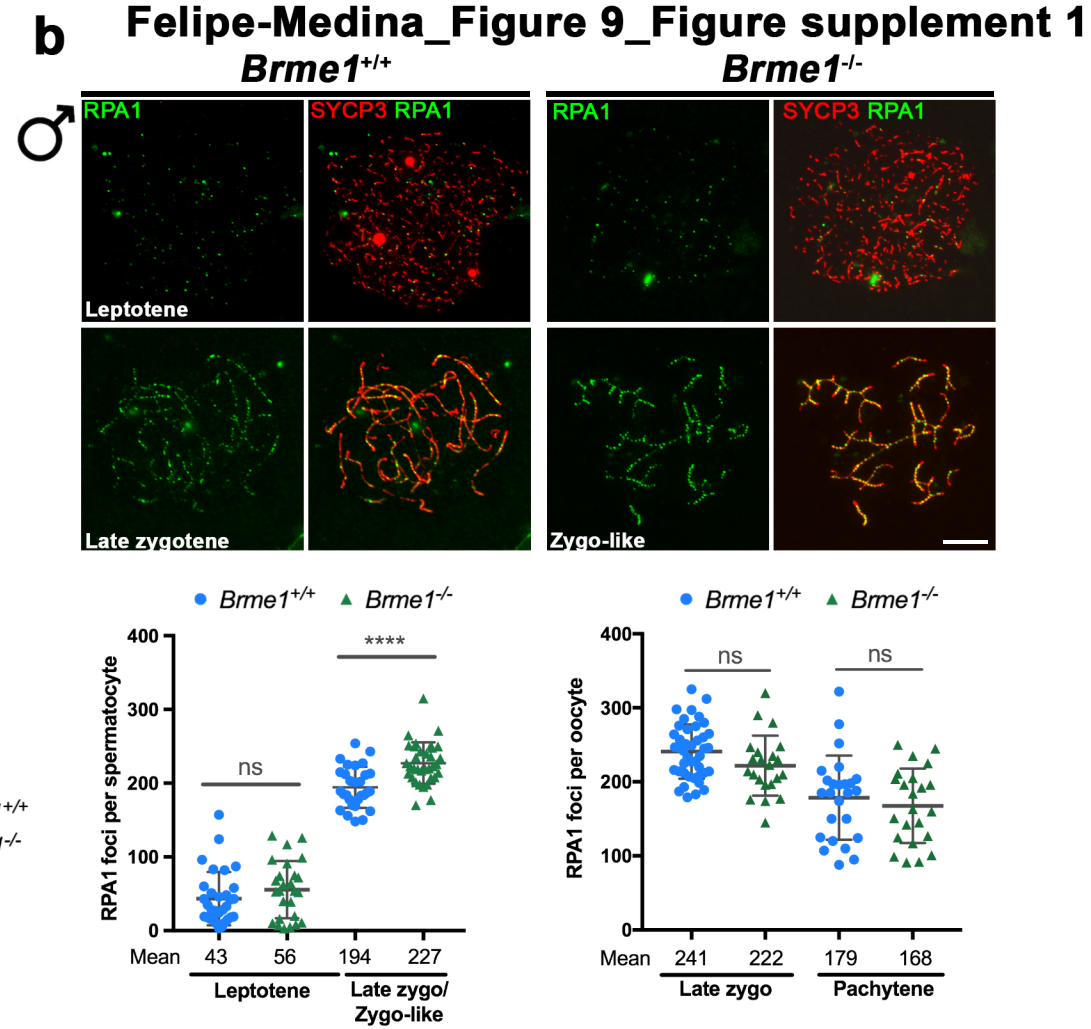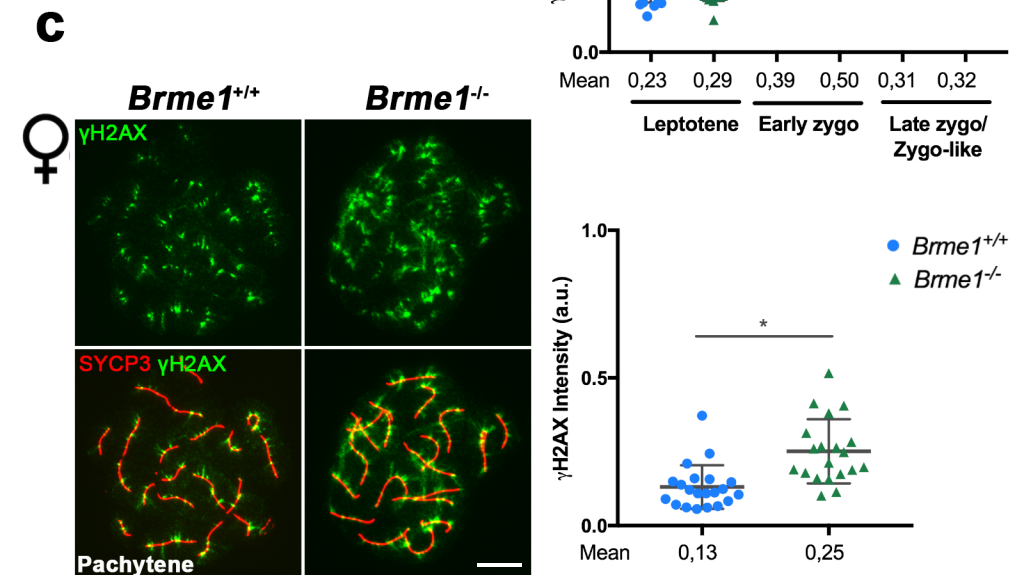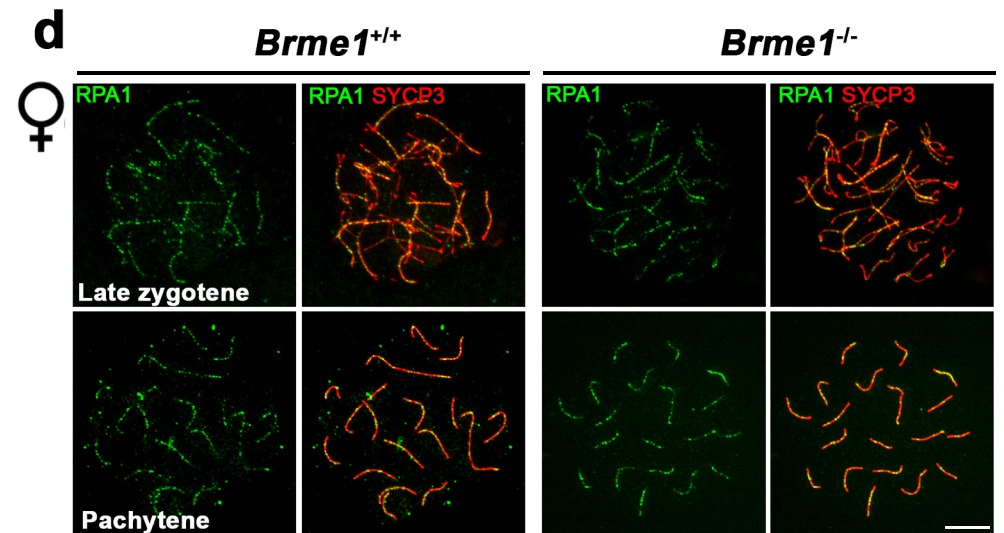

Supplement: supp [file elife-56996-supp-v1.zip]

**a**

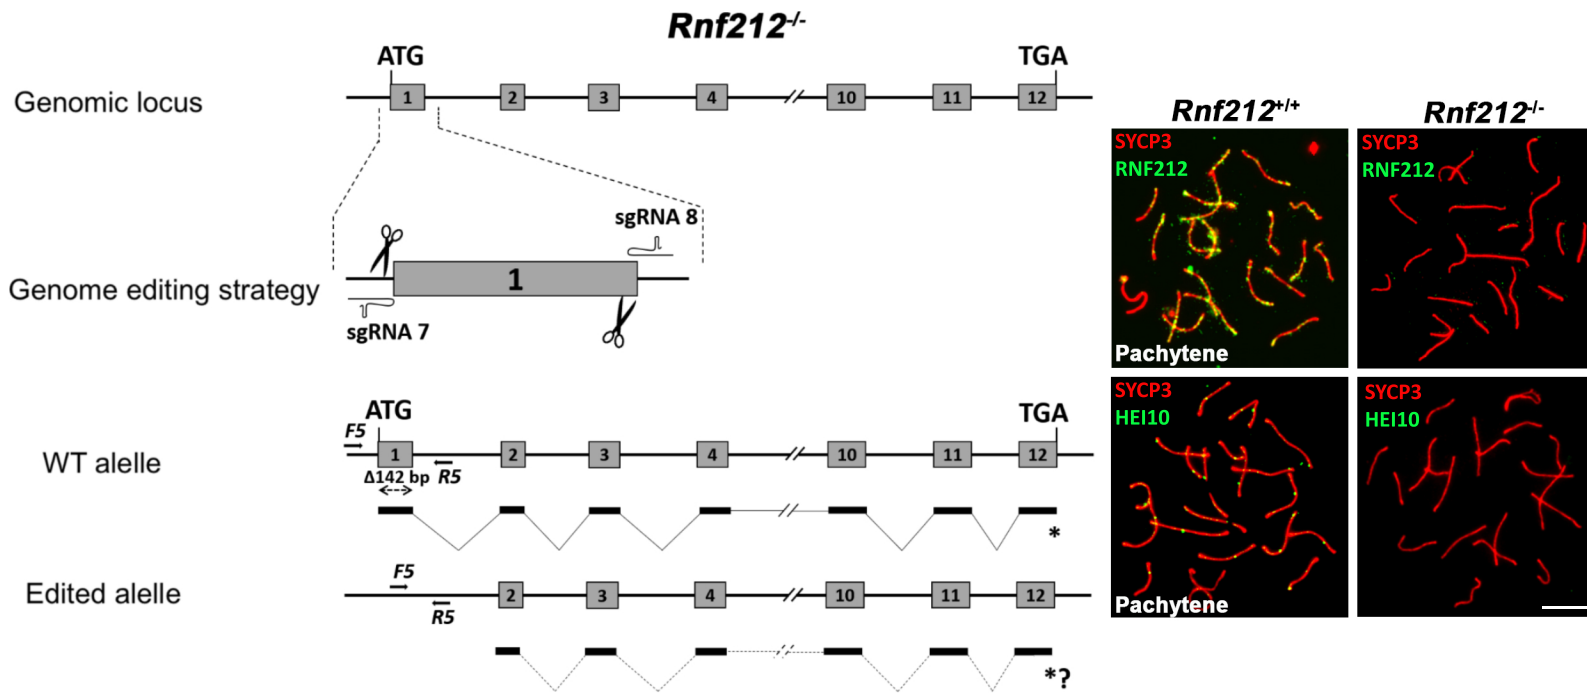

**b**

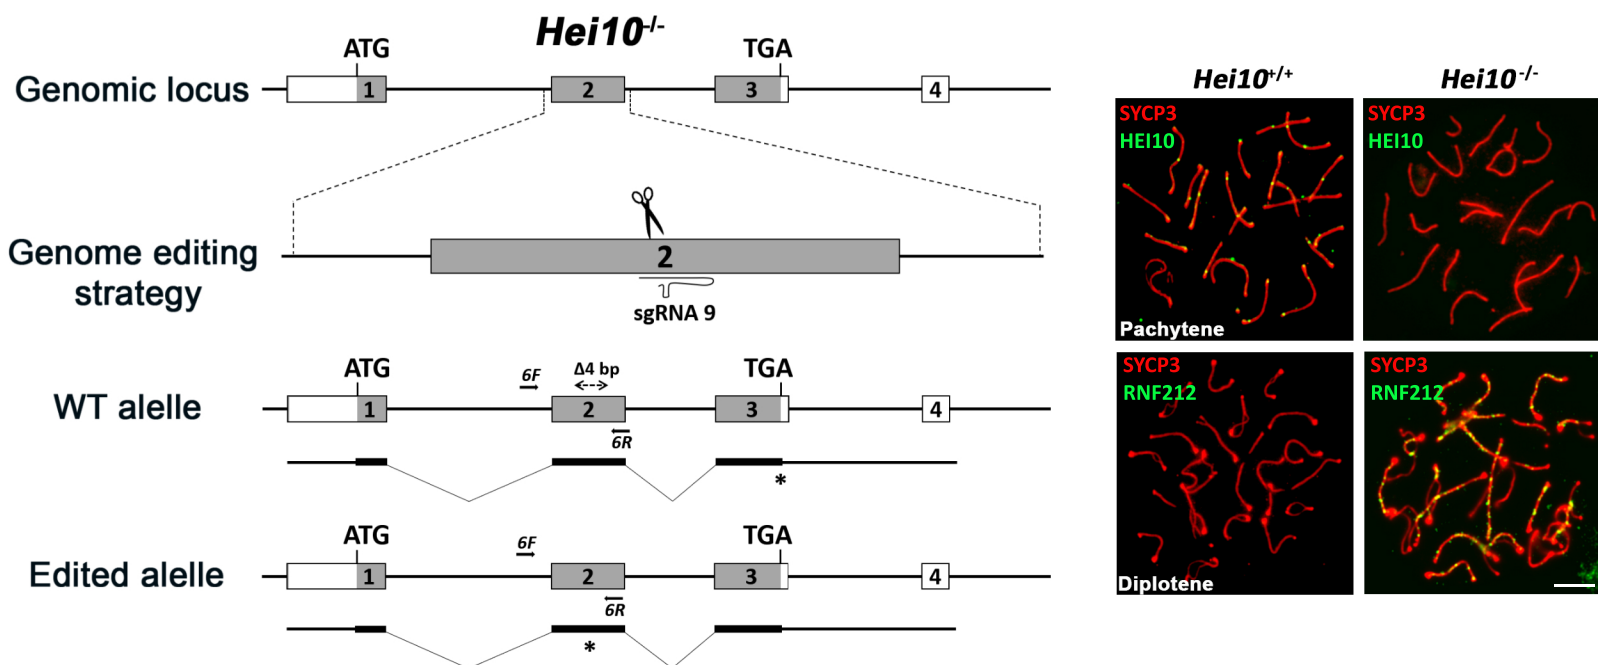

Supplement: supp [file elife-56996-supp-v1.zip]

**a**

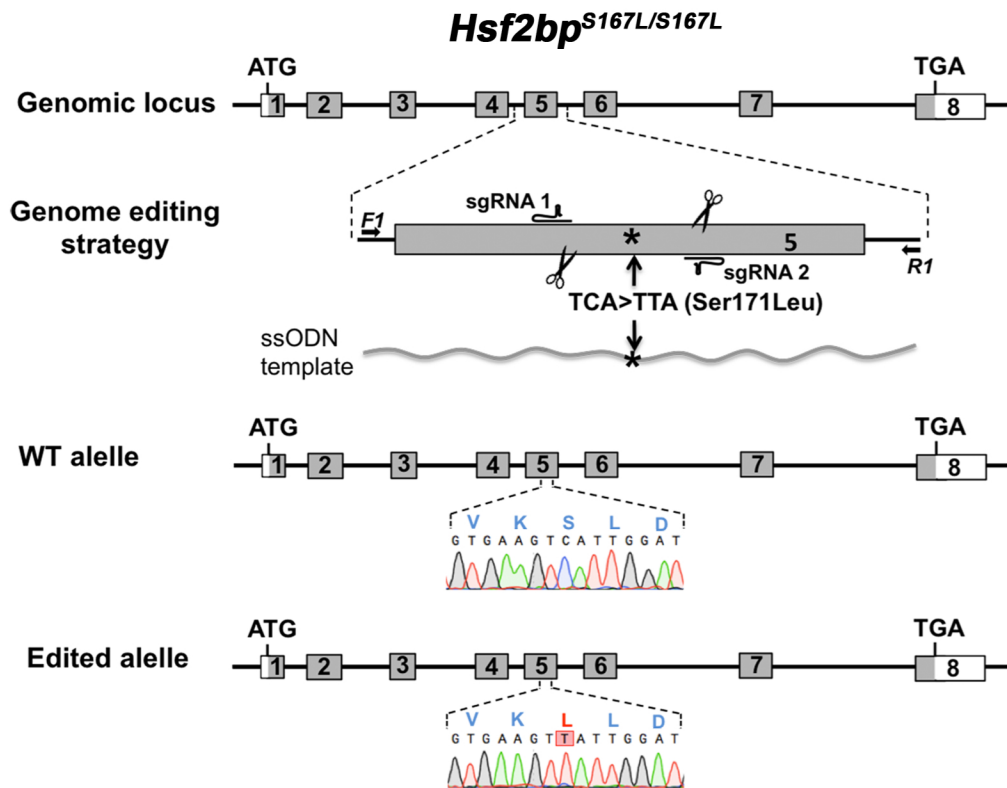

**b**

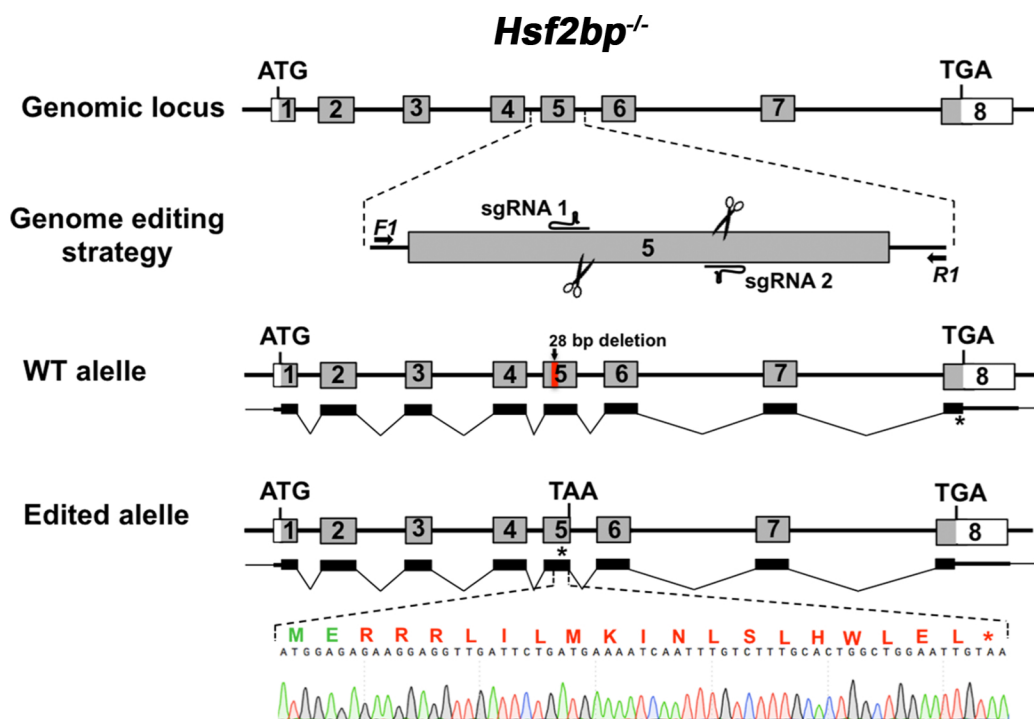

**d**

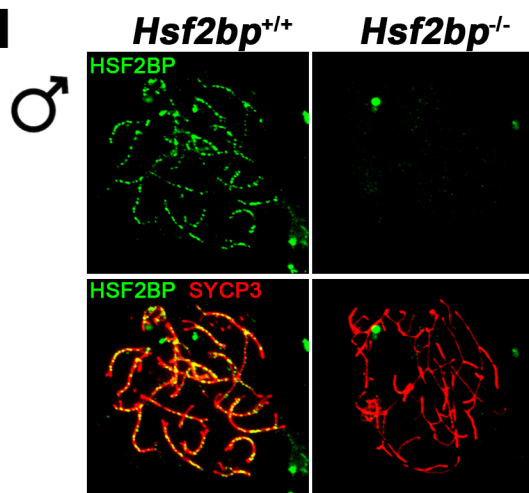

**c**

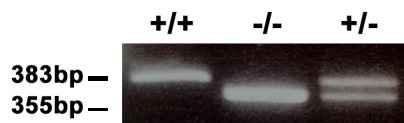

Supplement: supp [file elife-56996-supp-v1.zip]

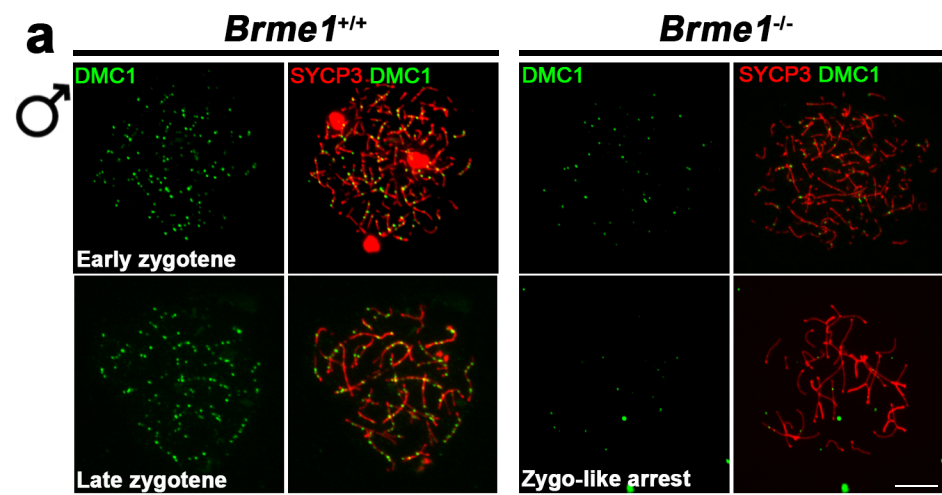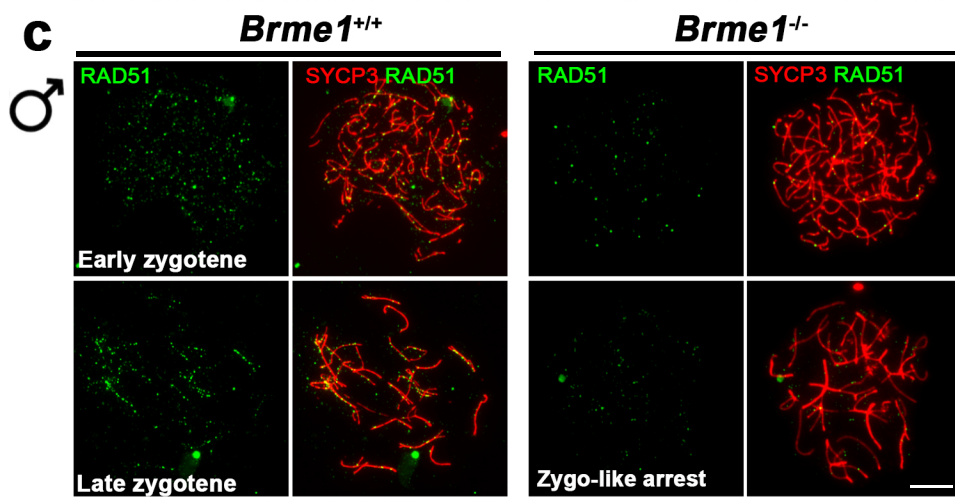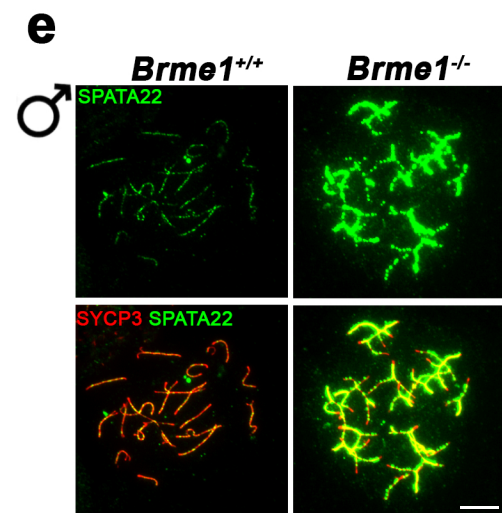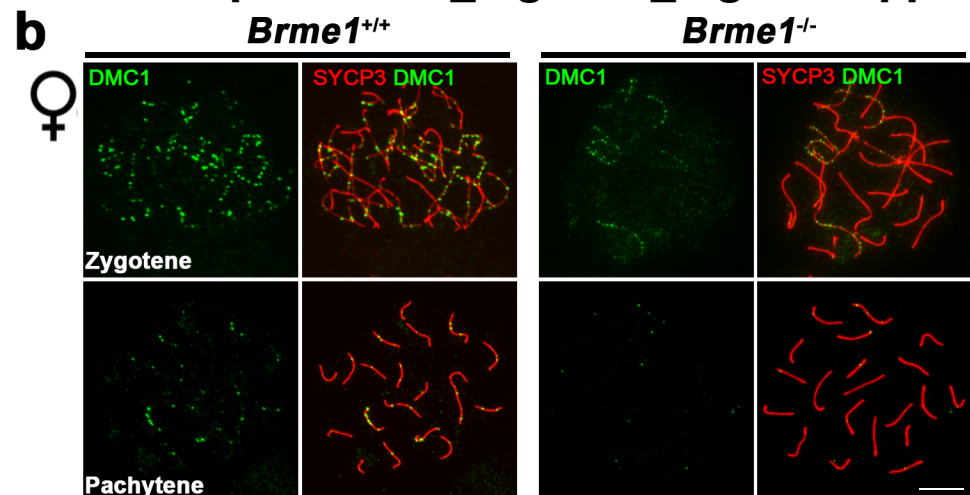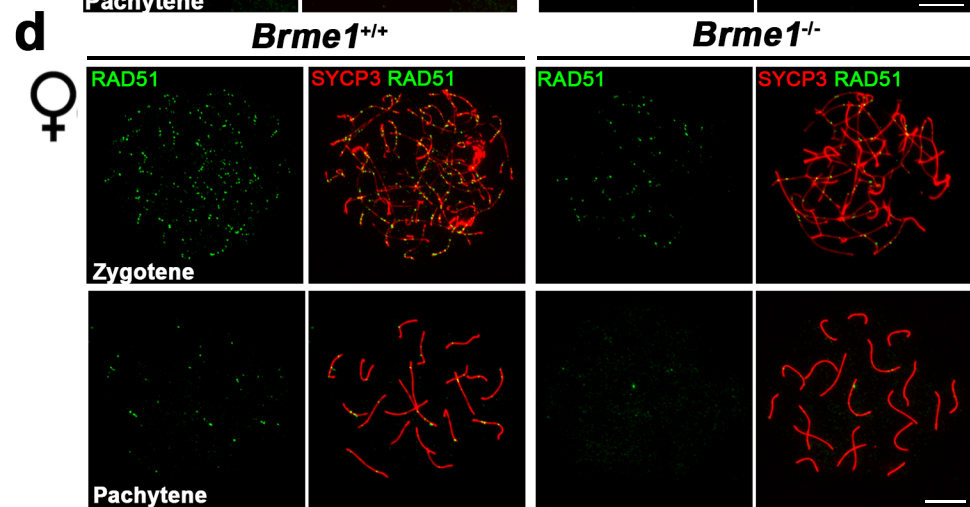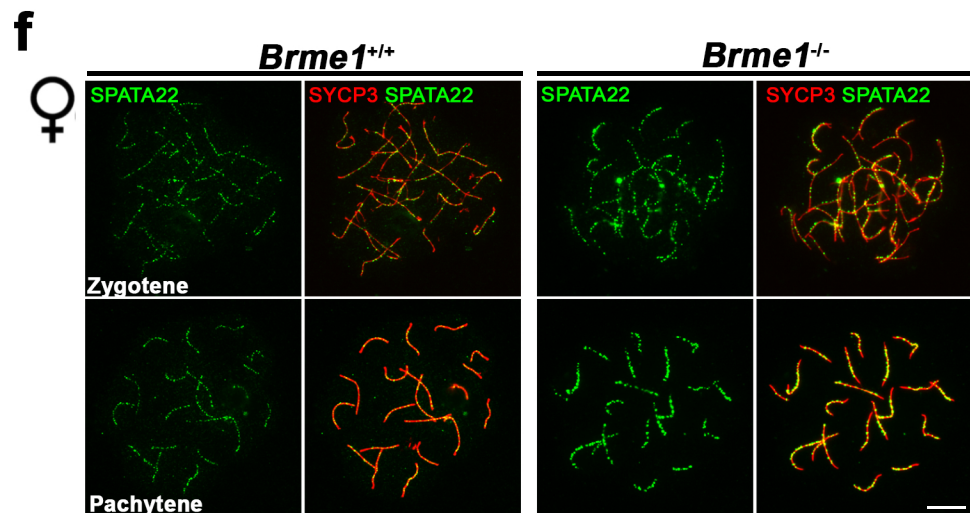

Supplement: supp [file elife-56996-supp-v1.zip]

**a**

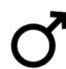

*Hsf2bp*<sup>+/+</sup>

*Hsf2bp*<sup>S167L/S167L</sup>

*Hsf2bp*<sup>-/-</sup>

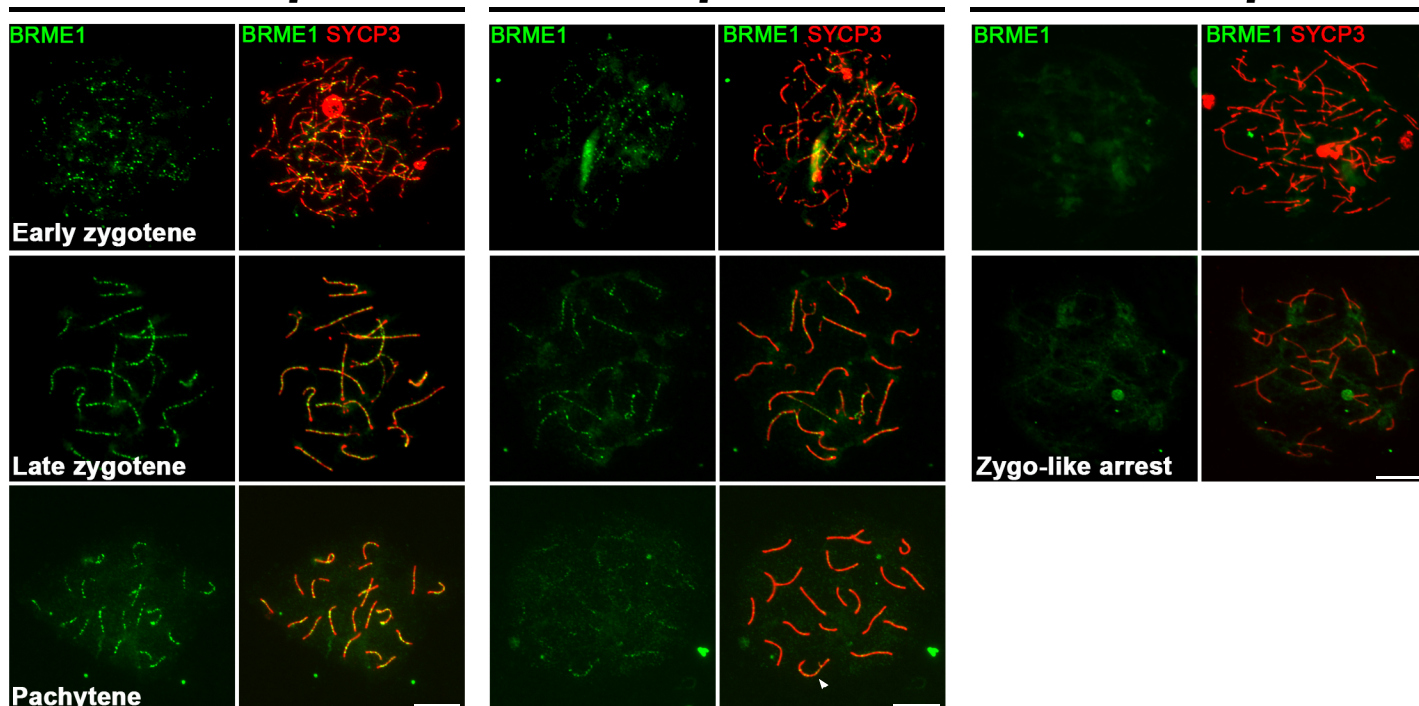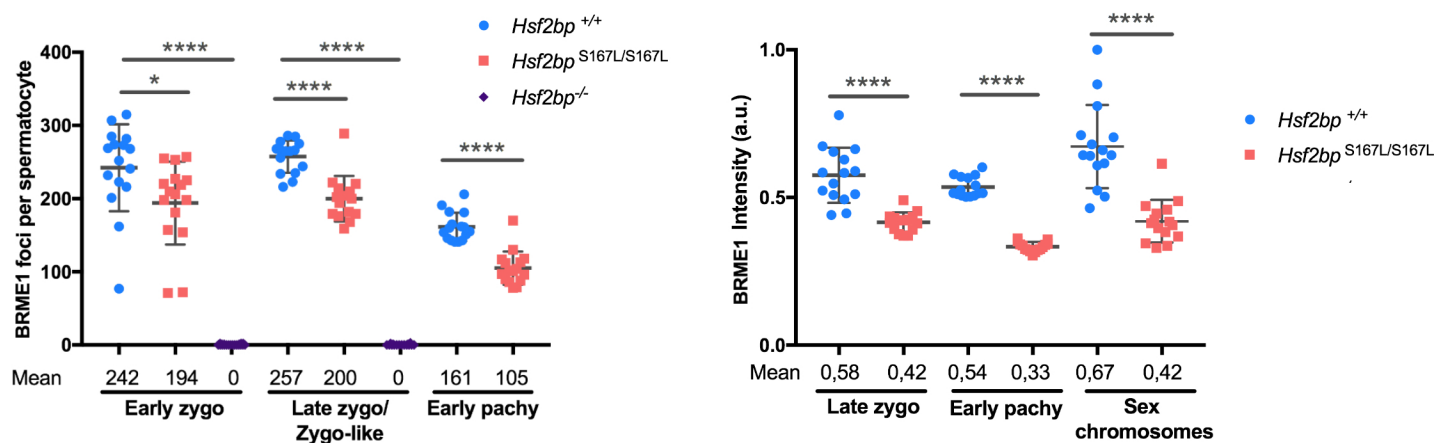

**b**

**TNT assay**

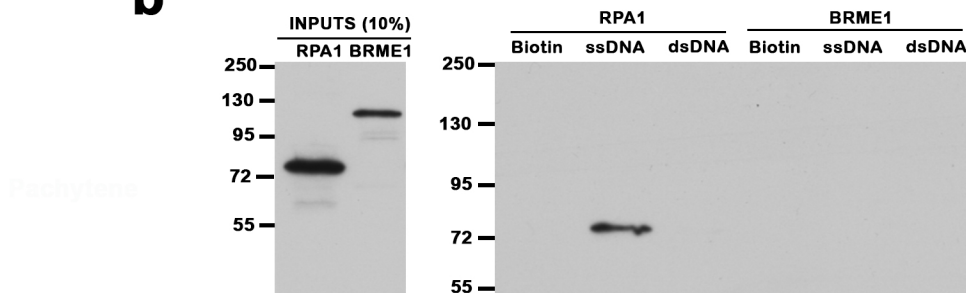

**TNT assay**

**c**

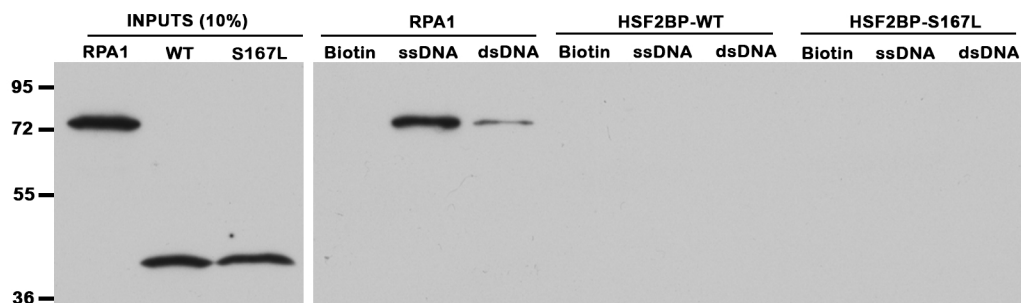

Supplement: supp [file elife-56996-supp-v1.zip]

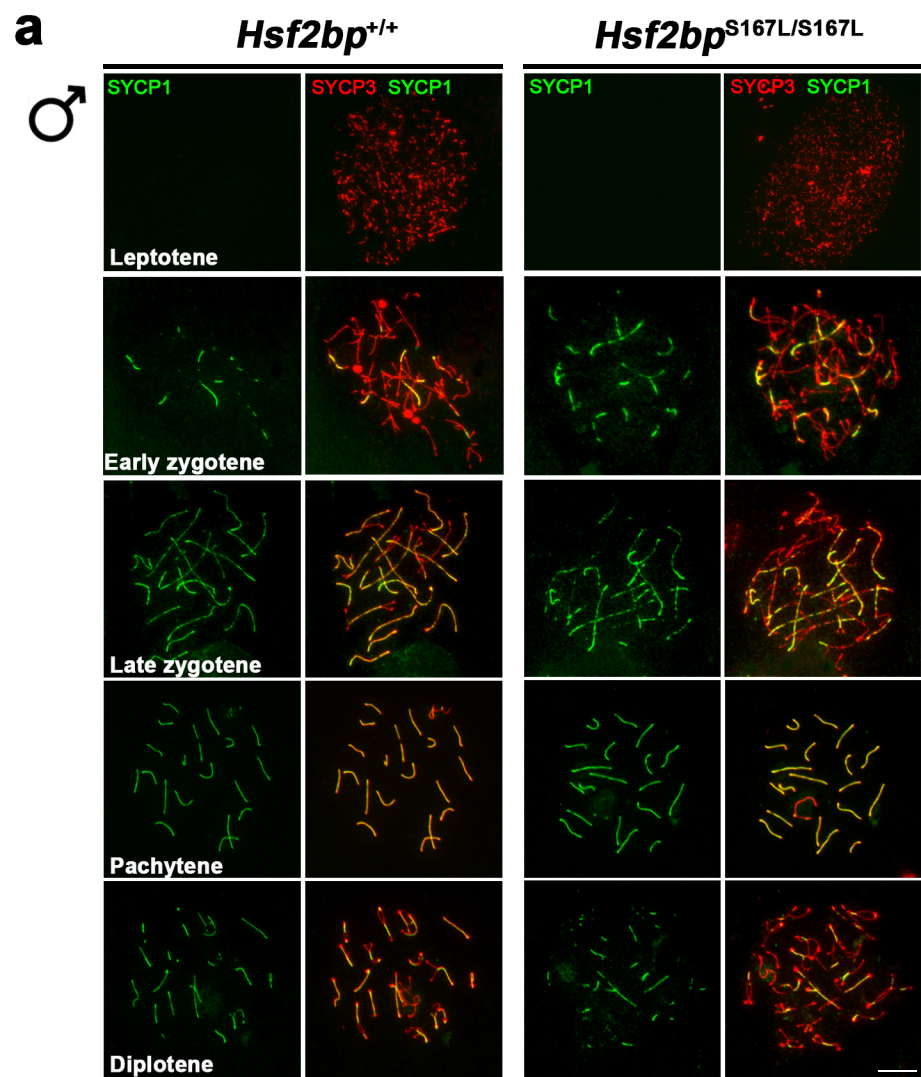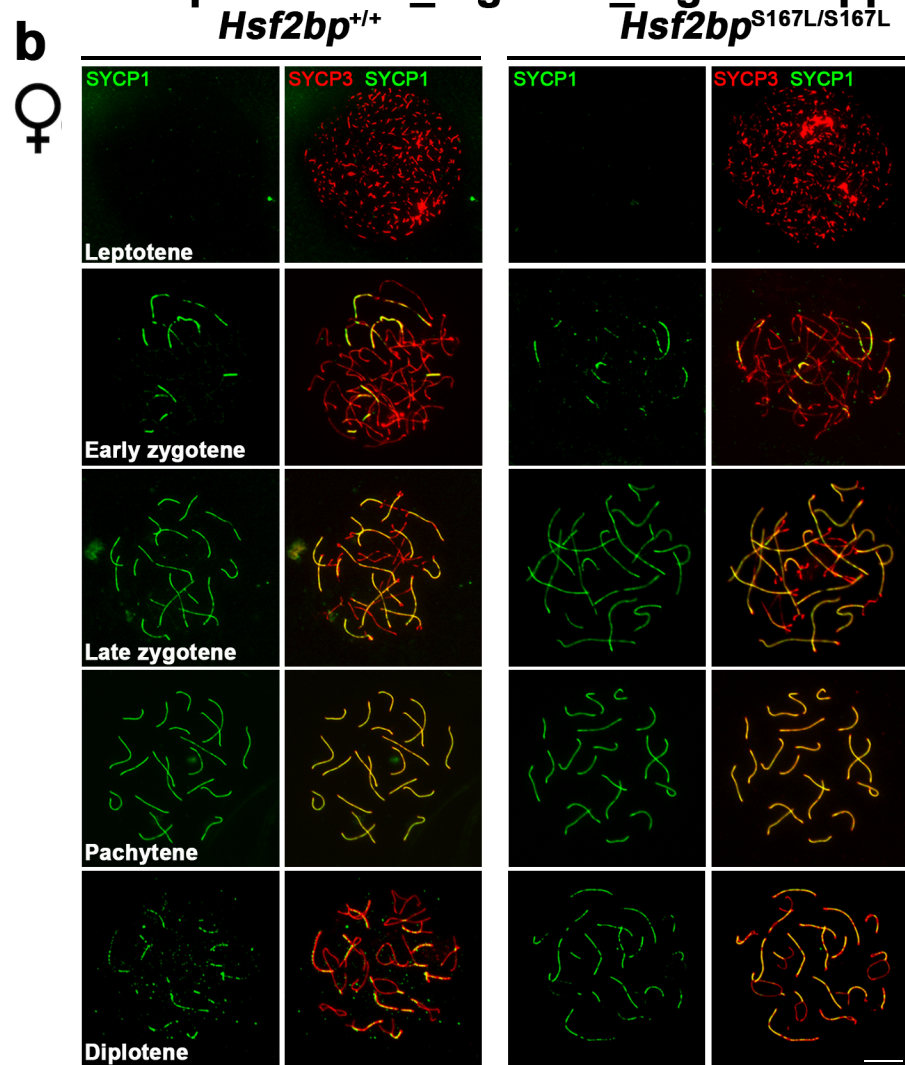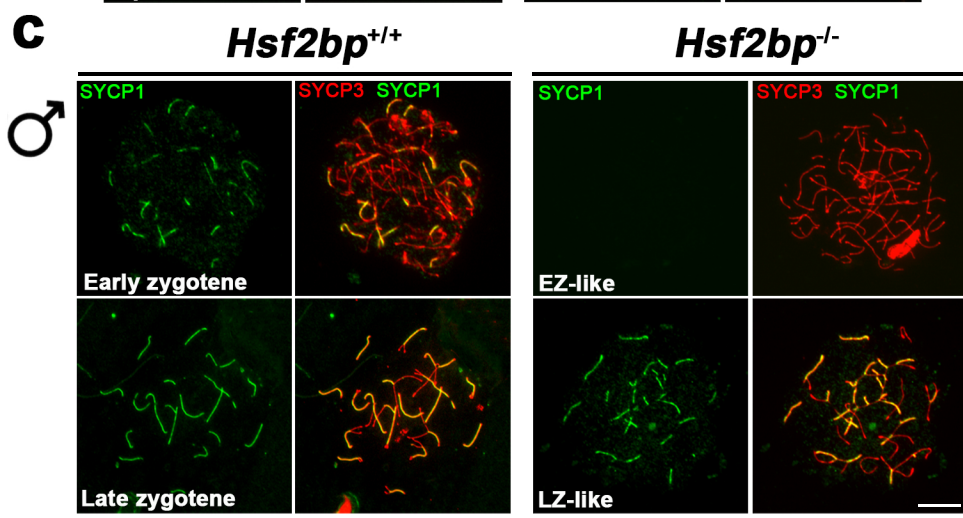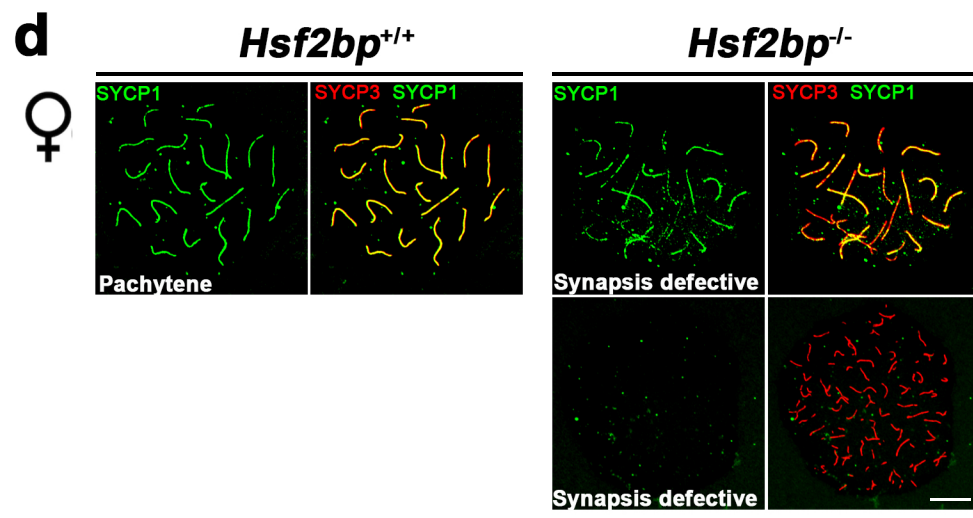

Supplement: supp [file elife-56996-supp-v1.zip]

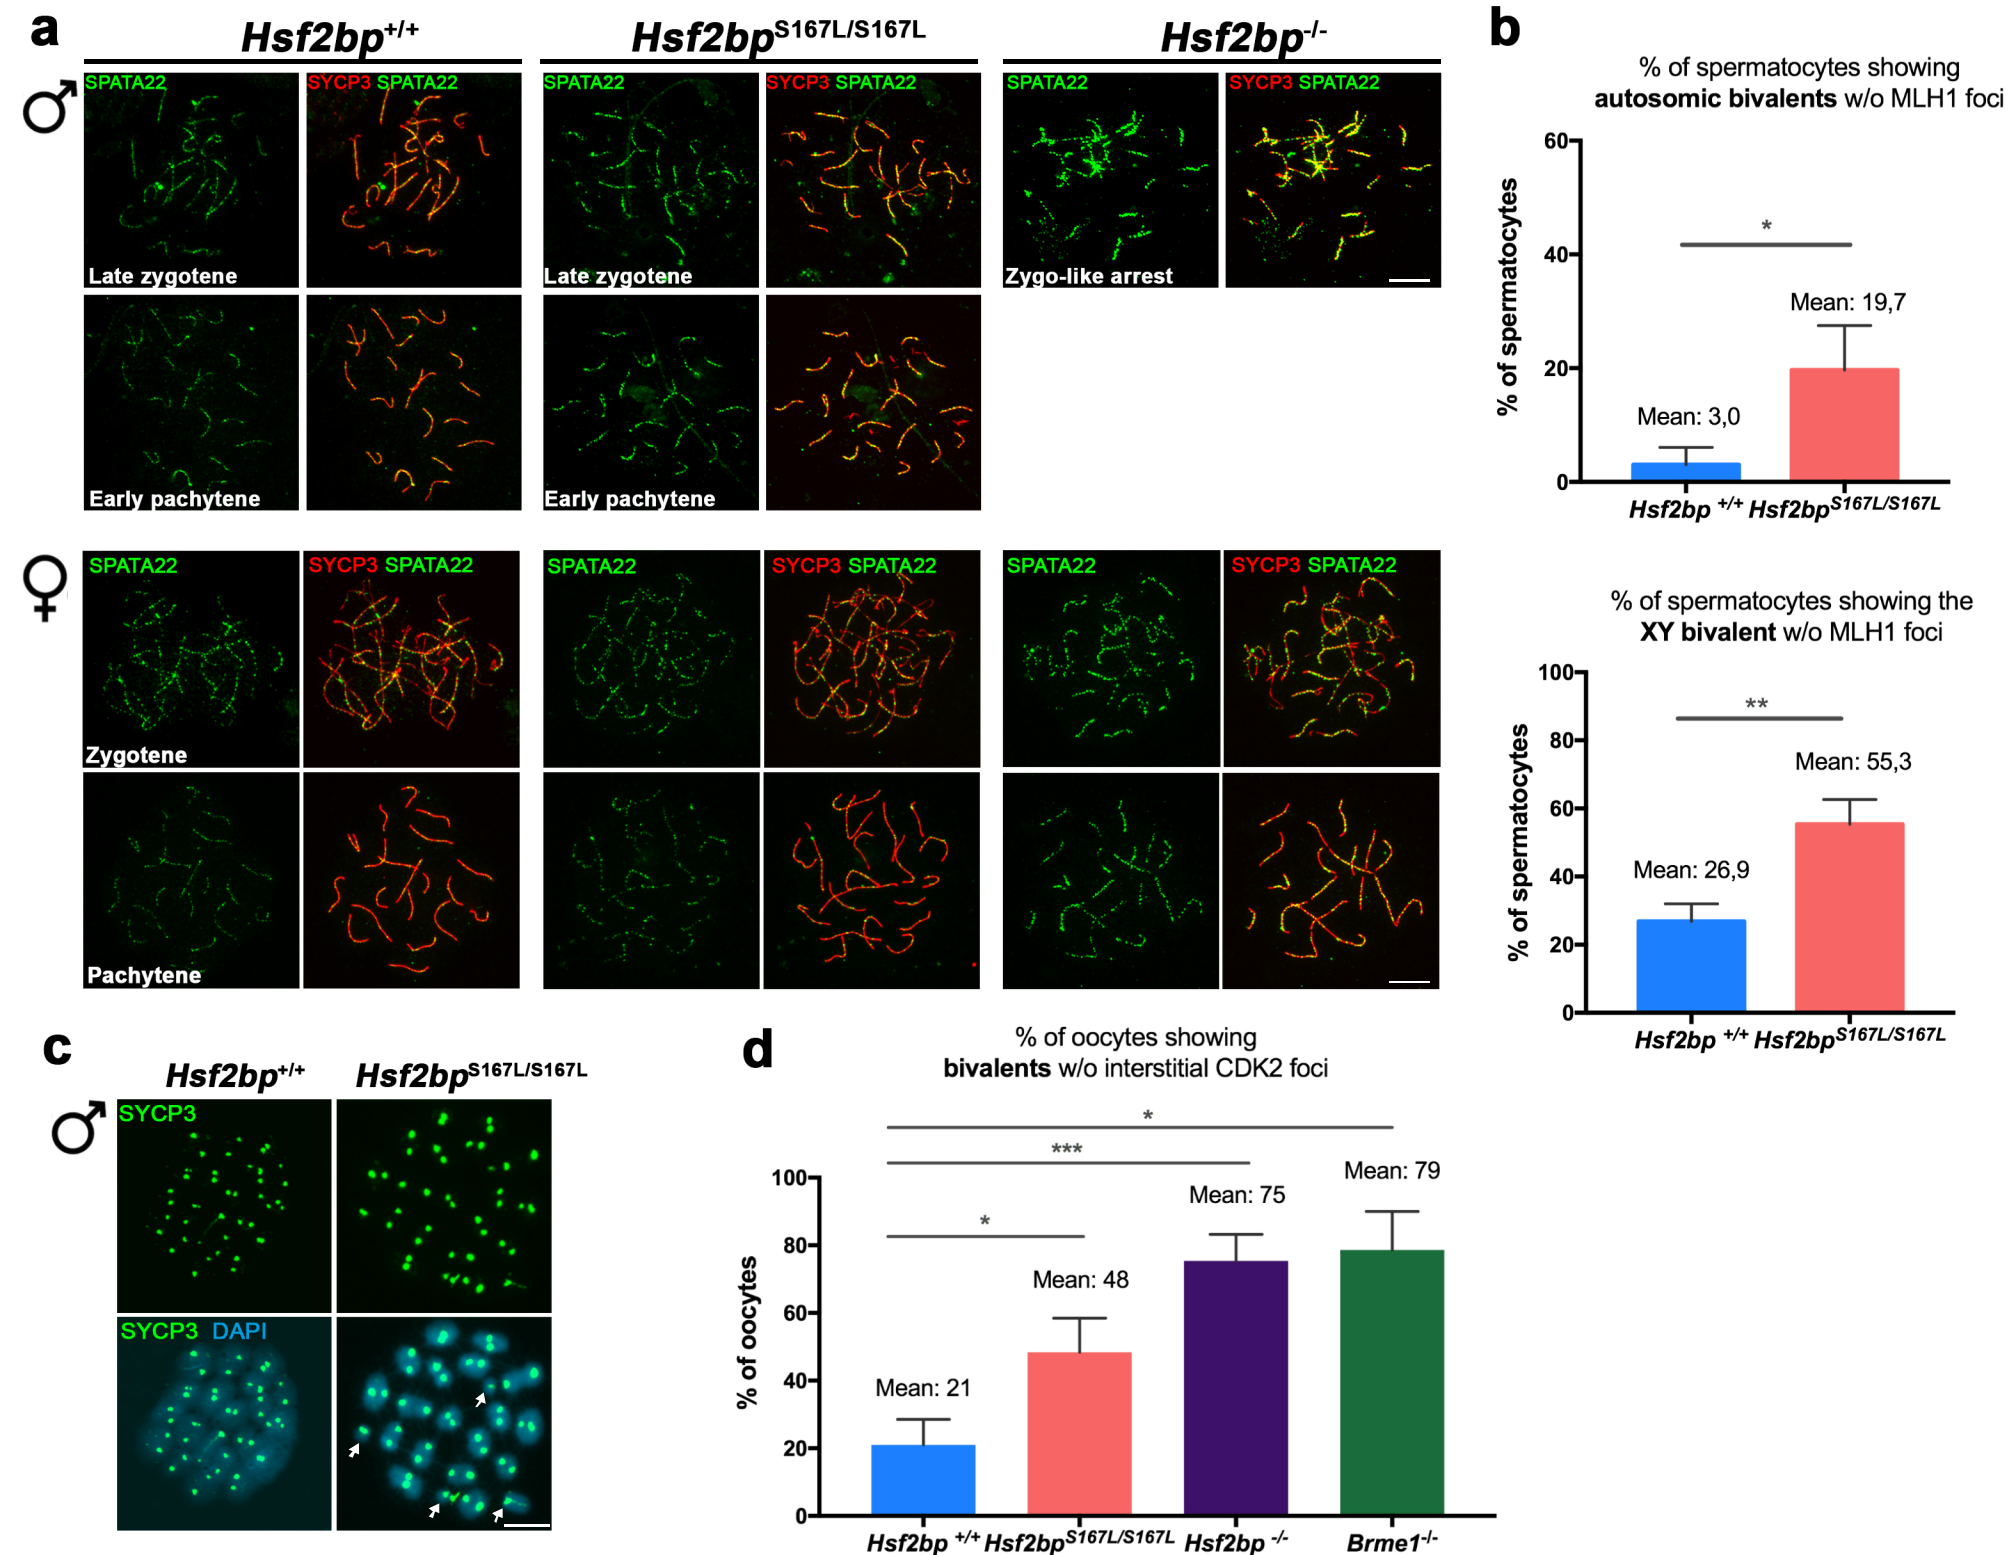

Supplement: supp [file elife-56996-supp-v1.zip]

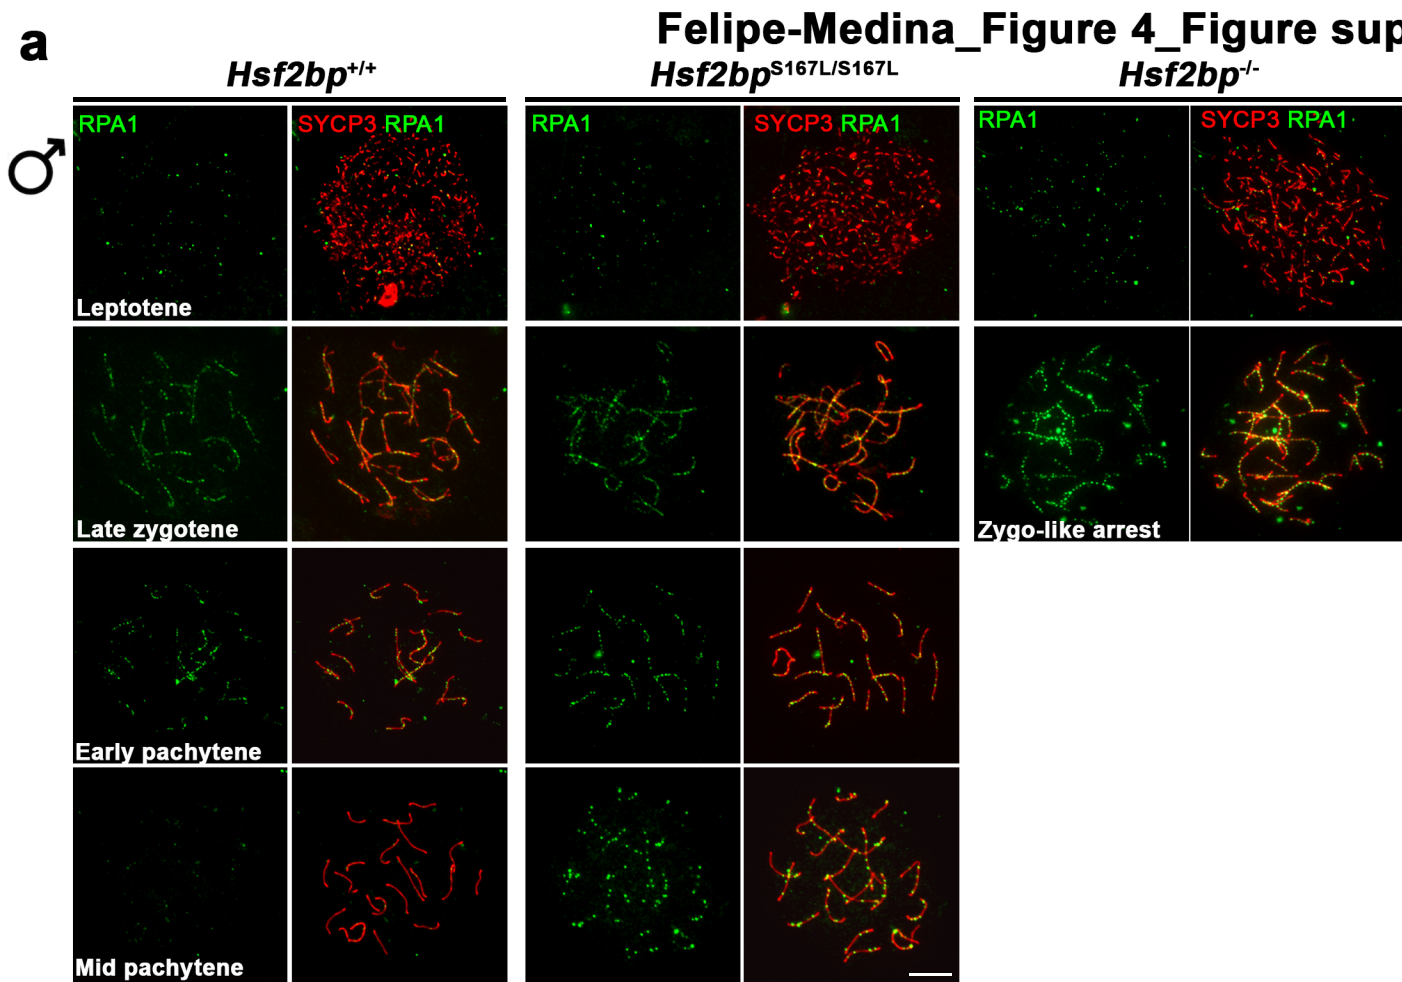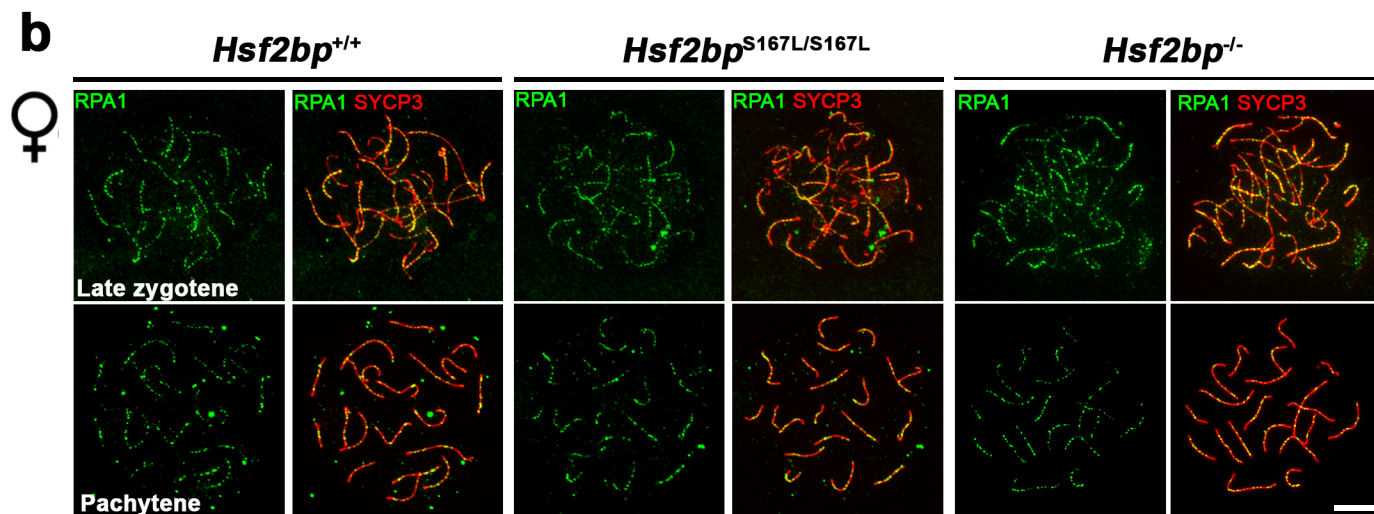

Supplement: supp [file elife-56996-supp-v1.zip]

*Hsf2bp*<sup>+/+</sup>*Hsf2bp*<sup>S167L/S167L</sup>*Hsf2bp*<sup>-/-</sup>

Felipe-Medina\_

Figure 5\_

Figure  
supplement 1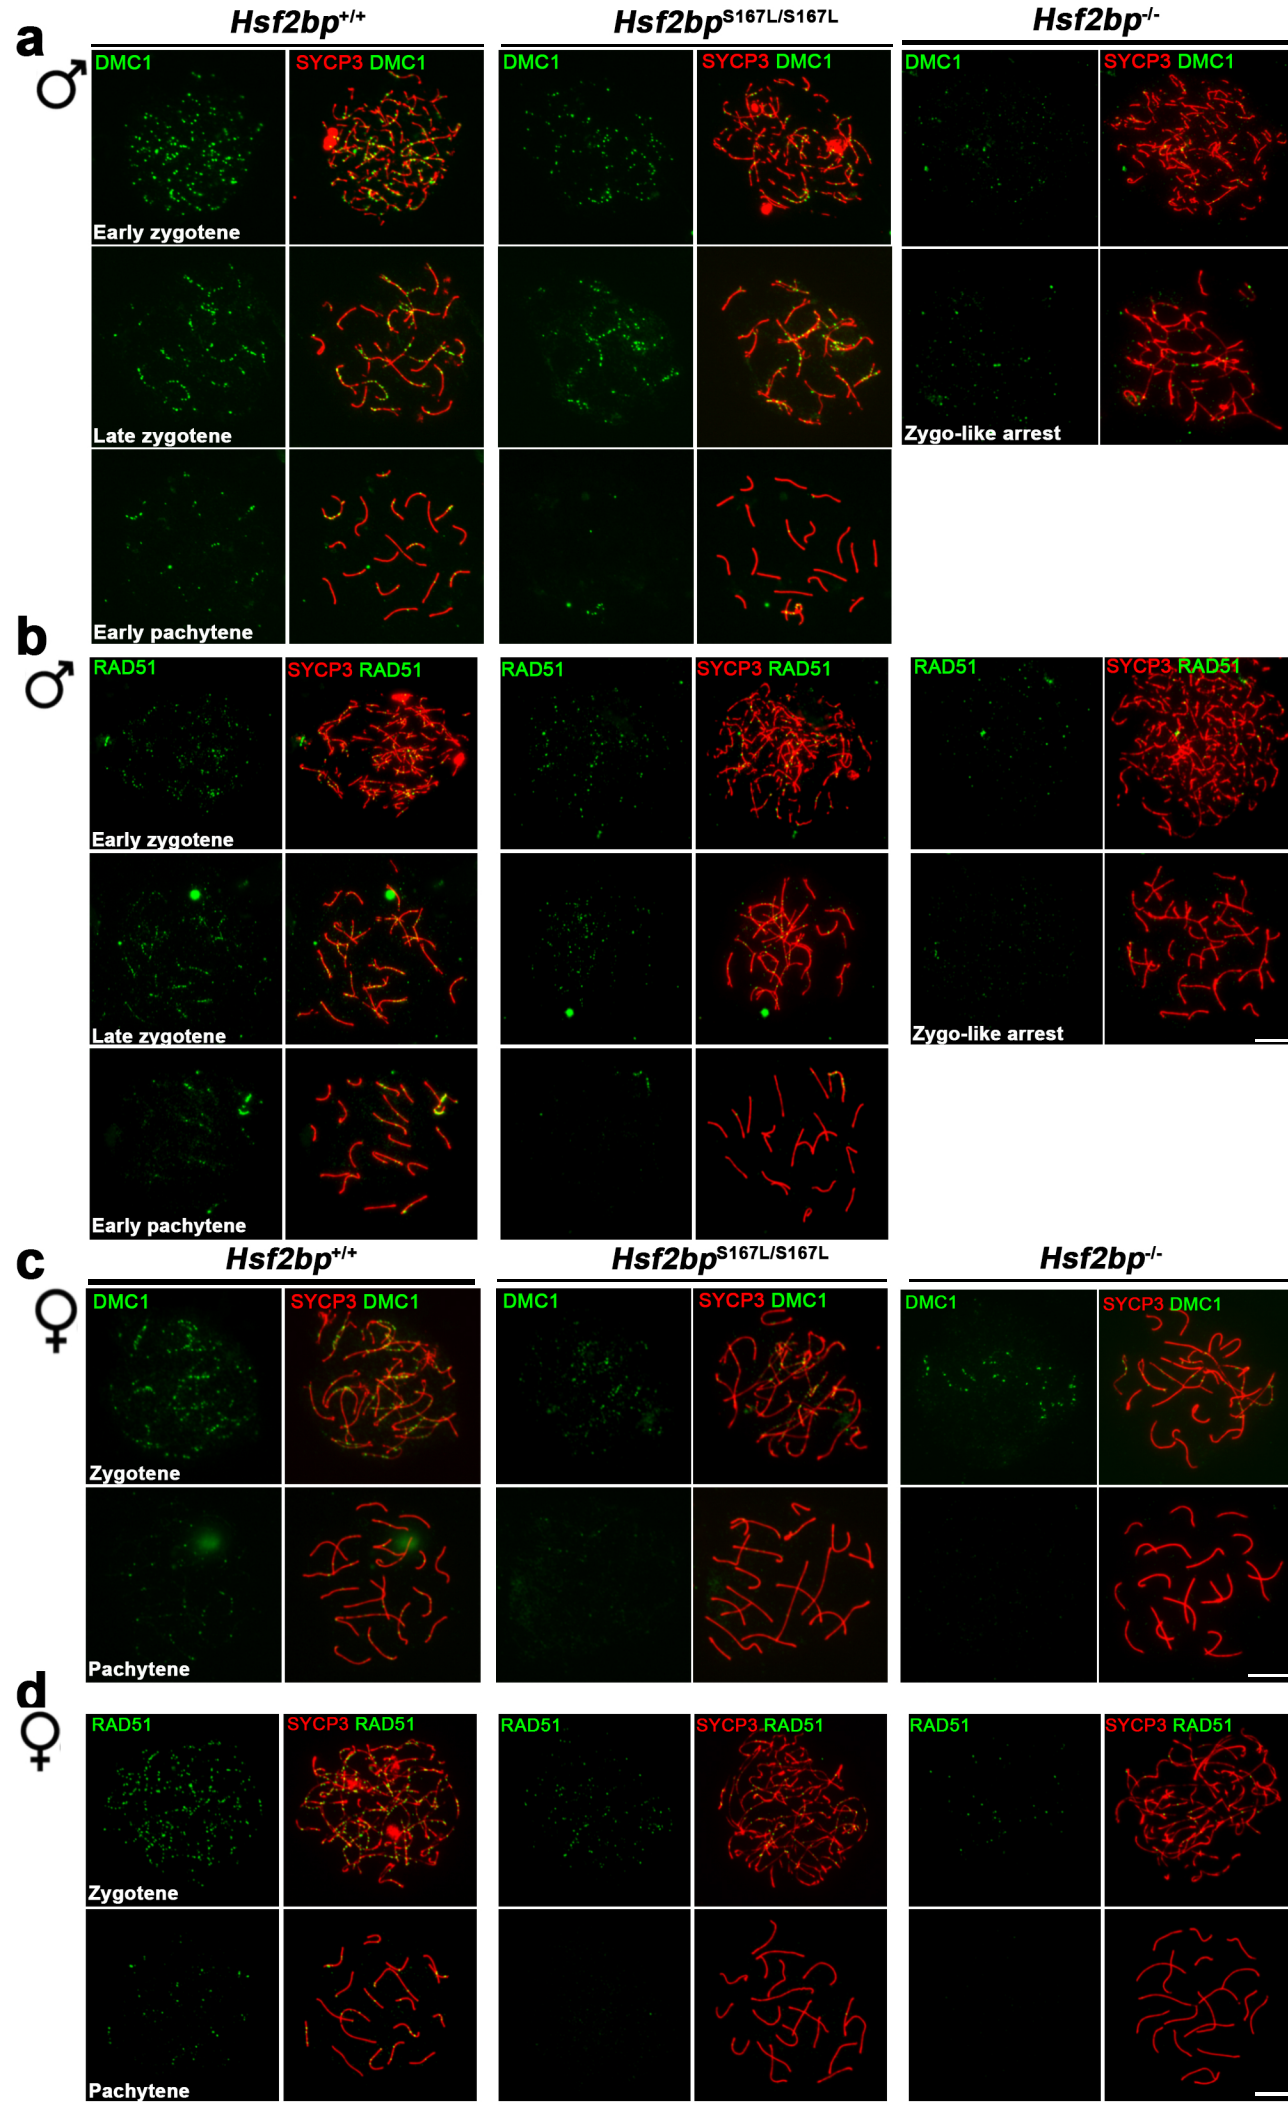

Supplement: supp [file elife-56996-supp-v1.zip]

**a**

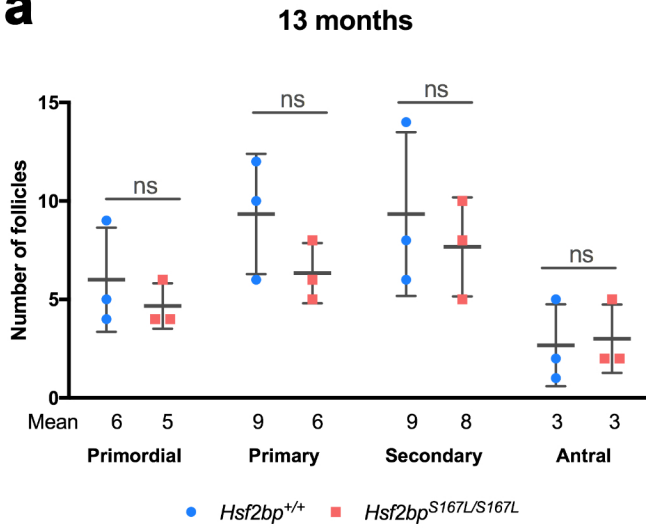

**b**

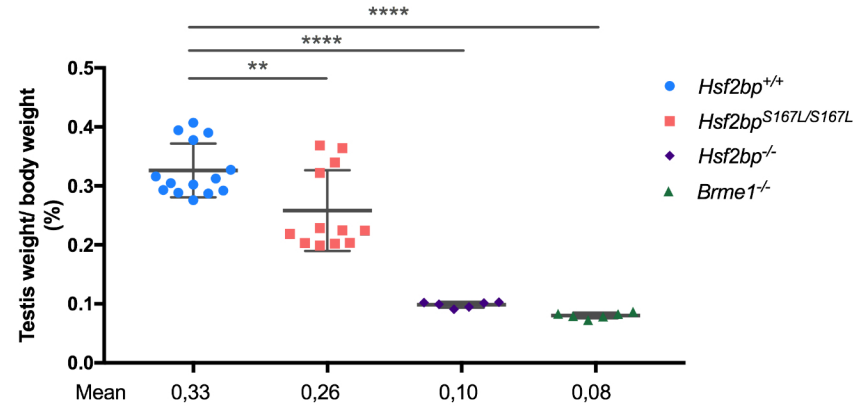

**c**

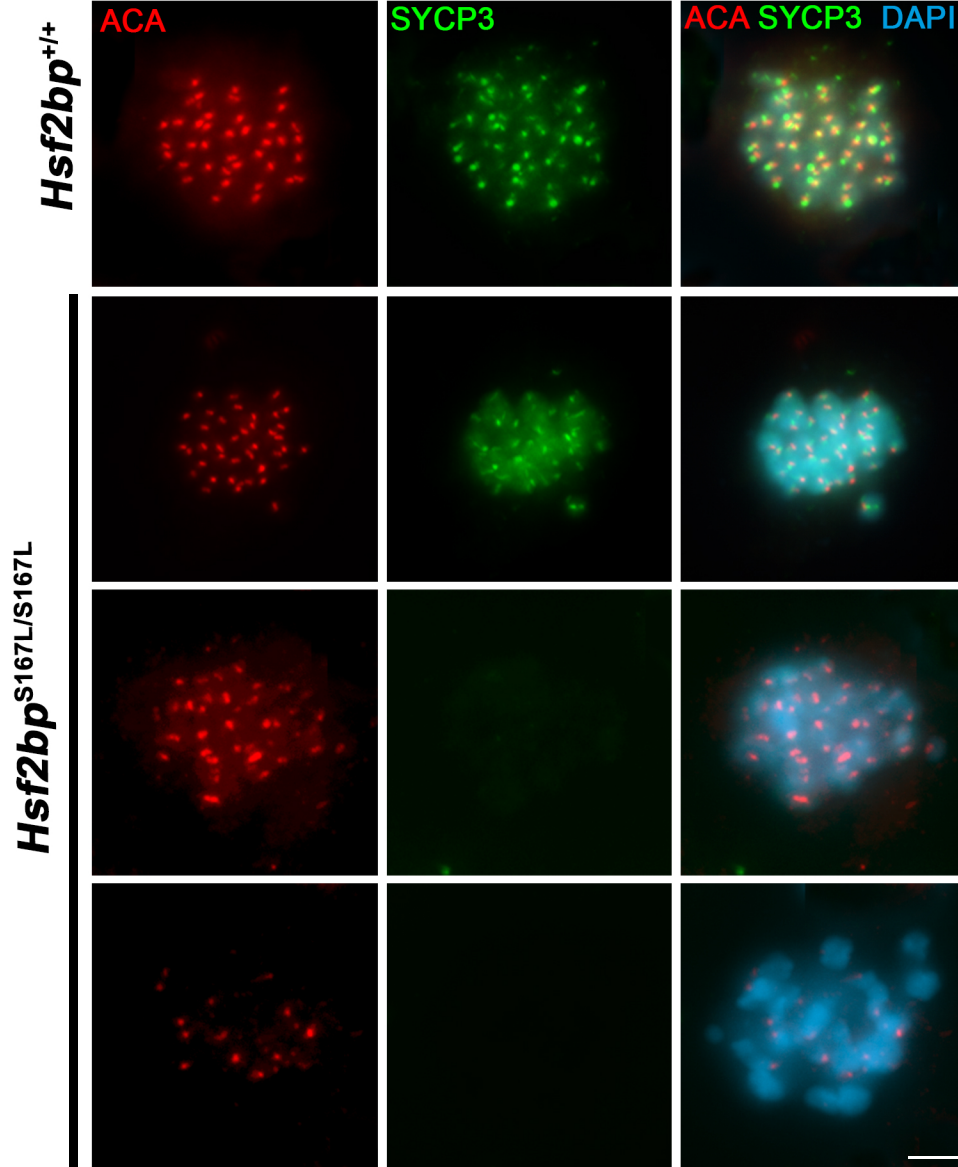

Supplement: supp [file elife-56996-supp-v1.zip]

**a**

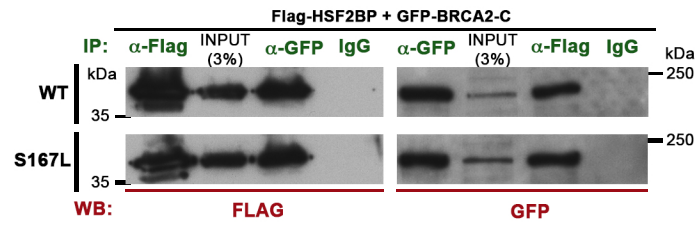

**b**

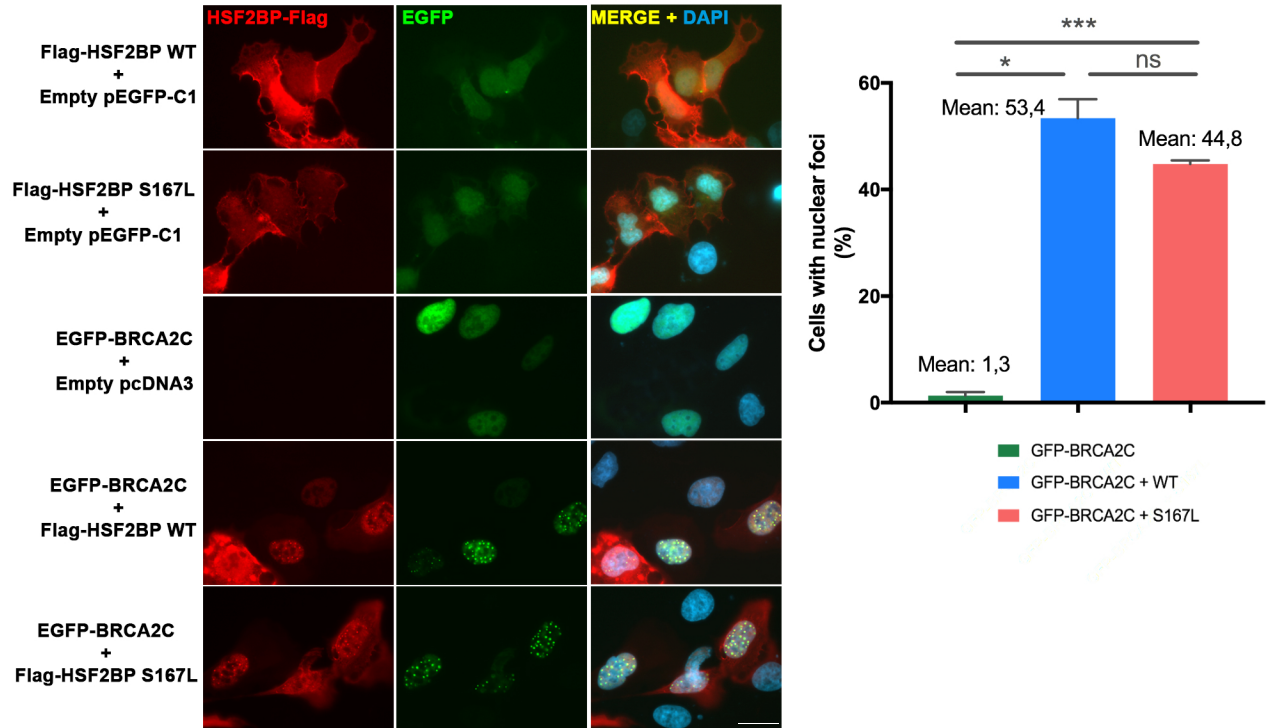

Supplement: supp [file elife-56996-supp-v1.zip]

**a**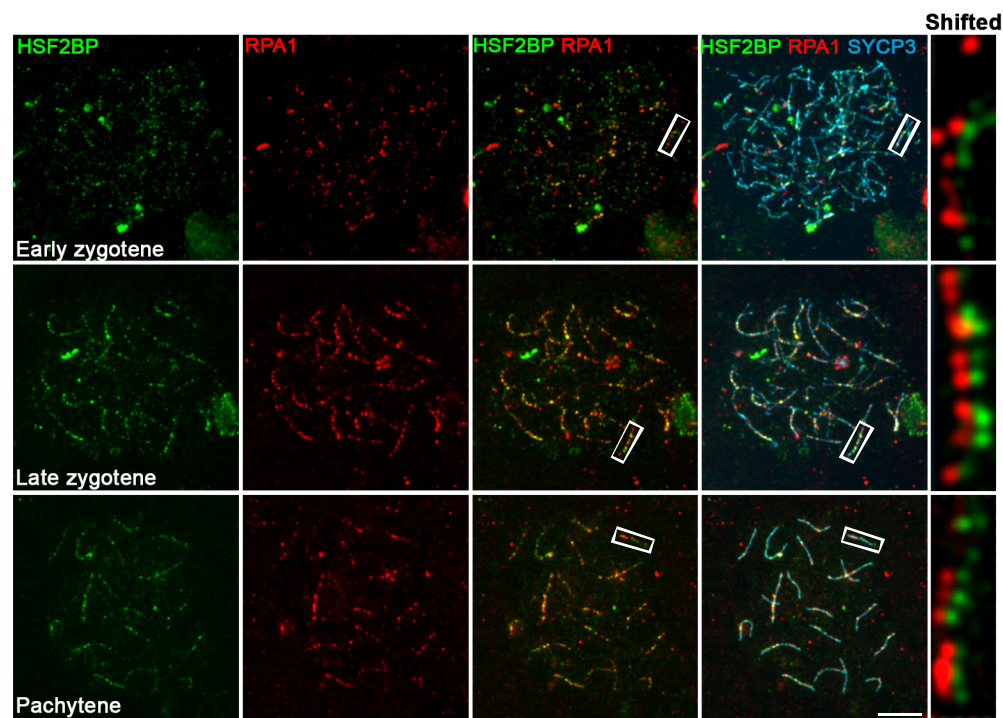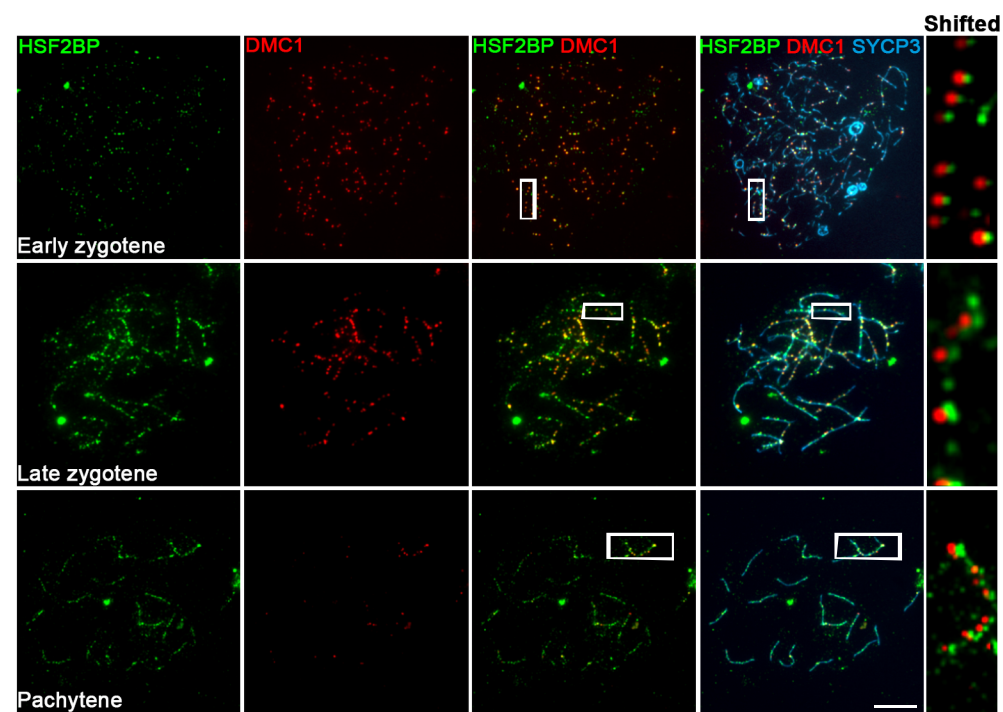**b**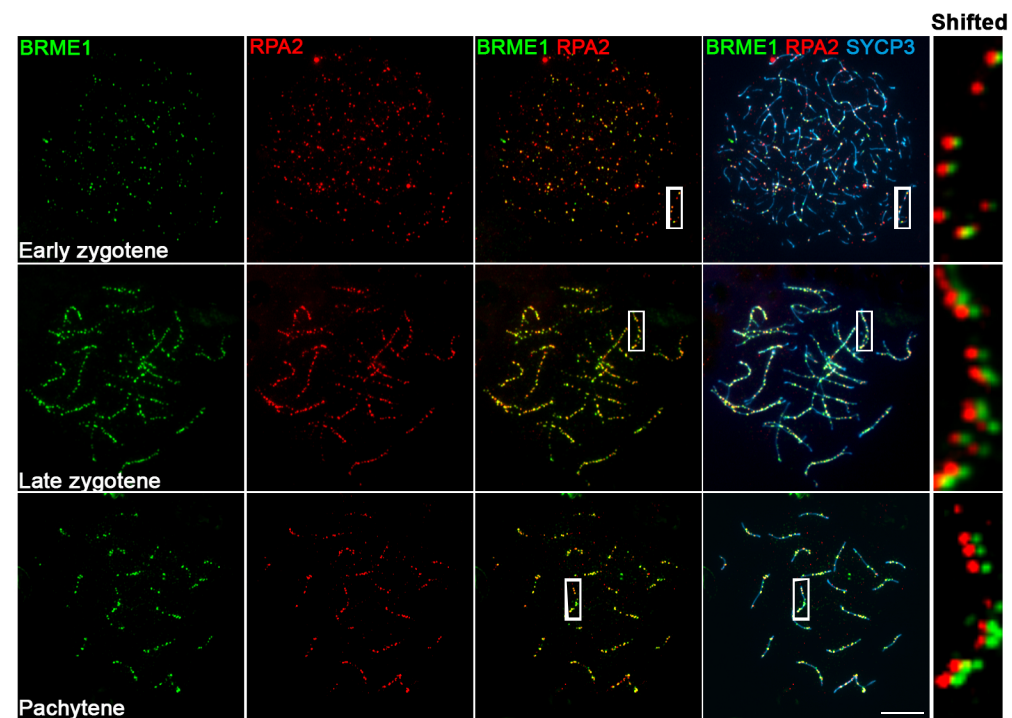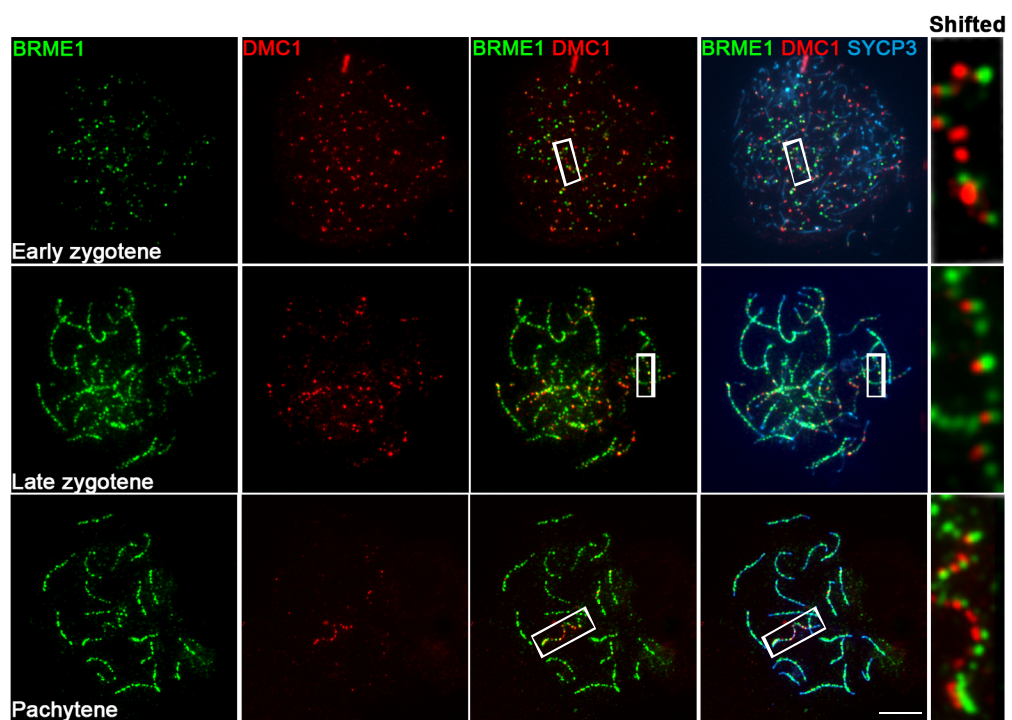

Supplement: supp [file elife-56996-supp-v1.zip]

a

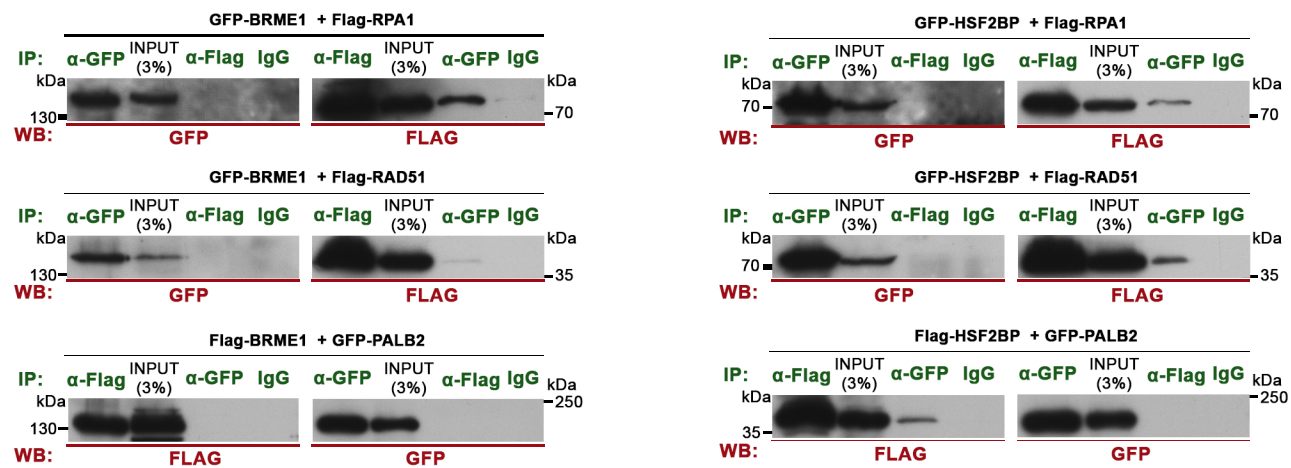

b

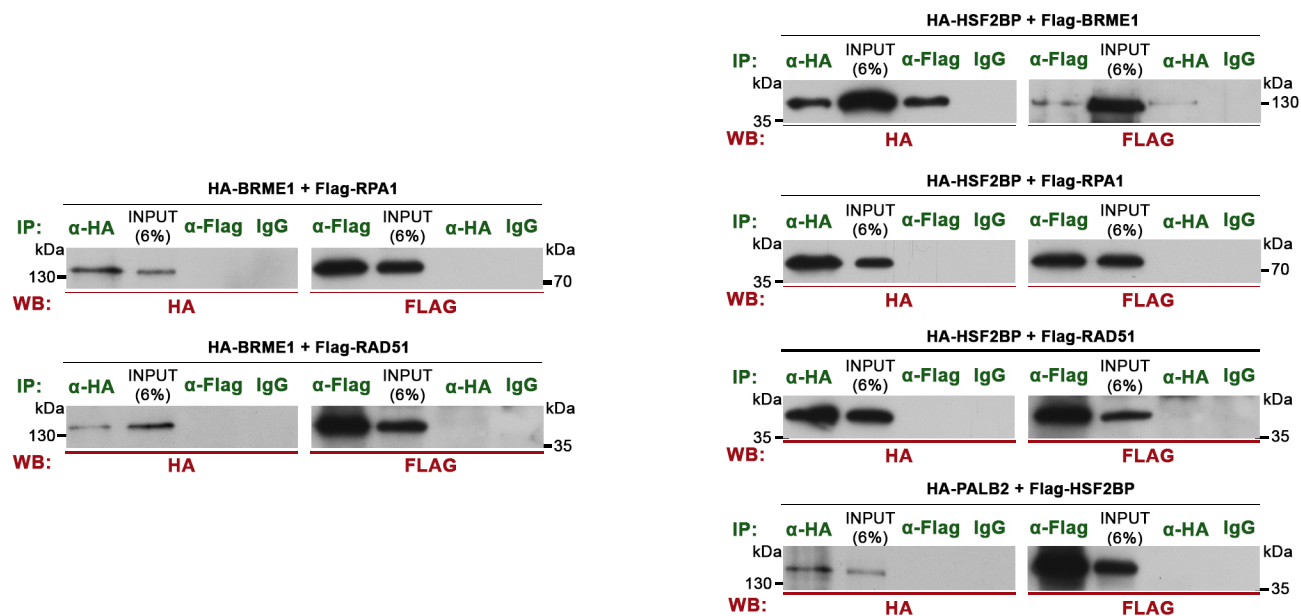

Supplement: supp [file elife-56996-supp-v1.zip]

**a**

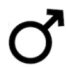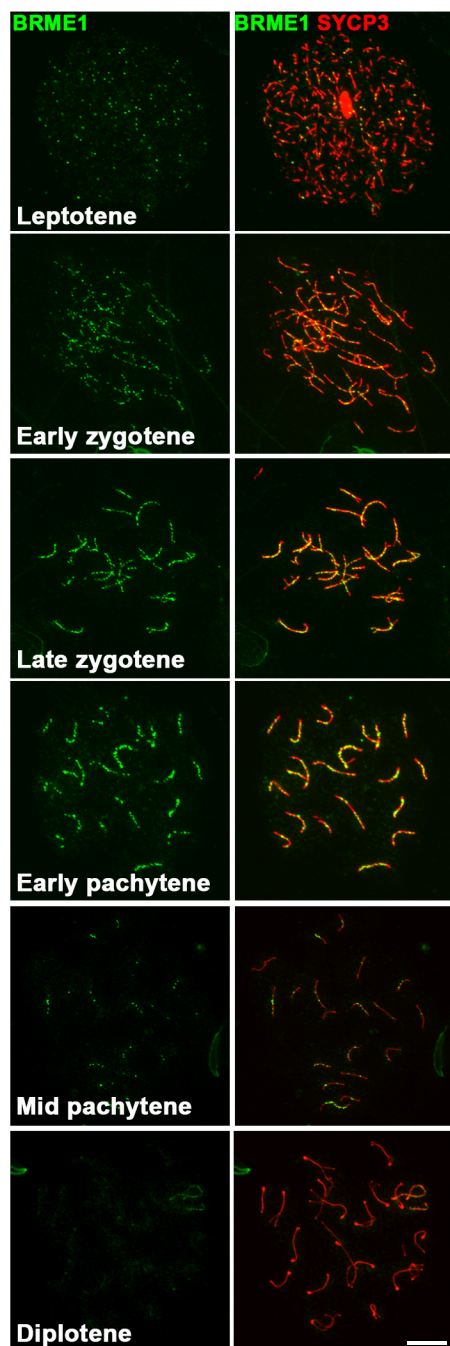

**b**

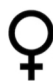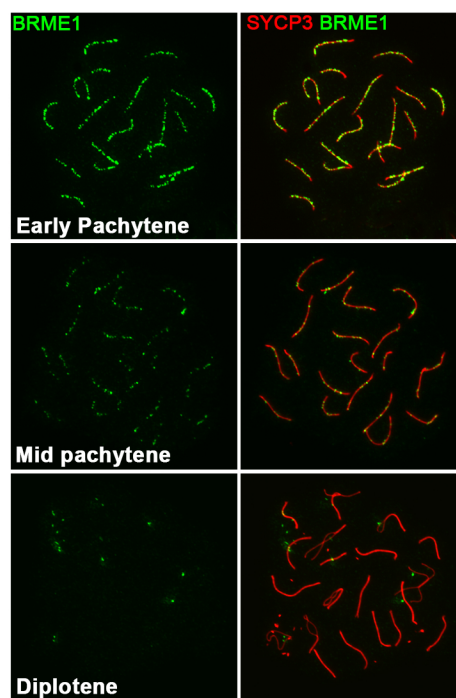

Supplement: supp [file elife-56996-supp-v1.zip]

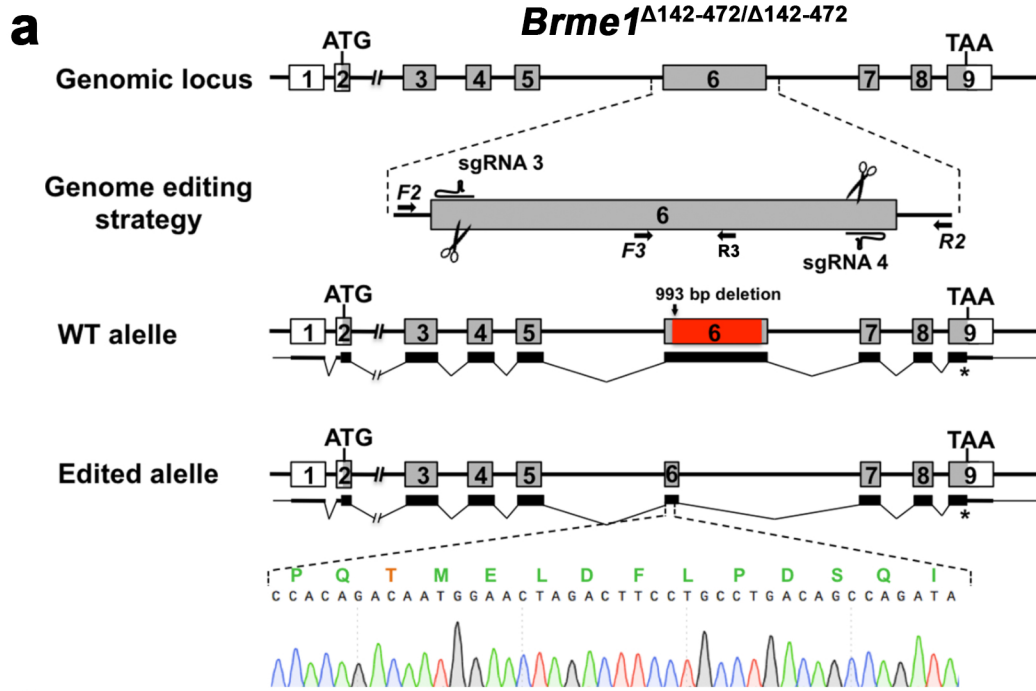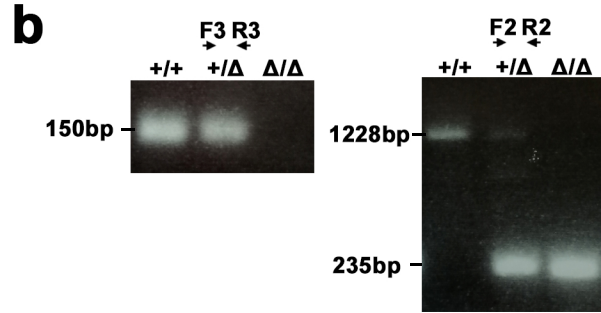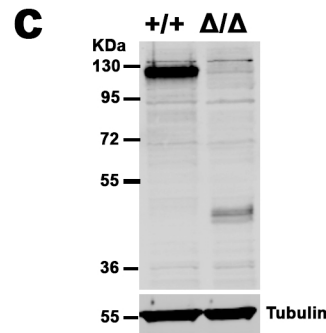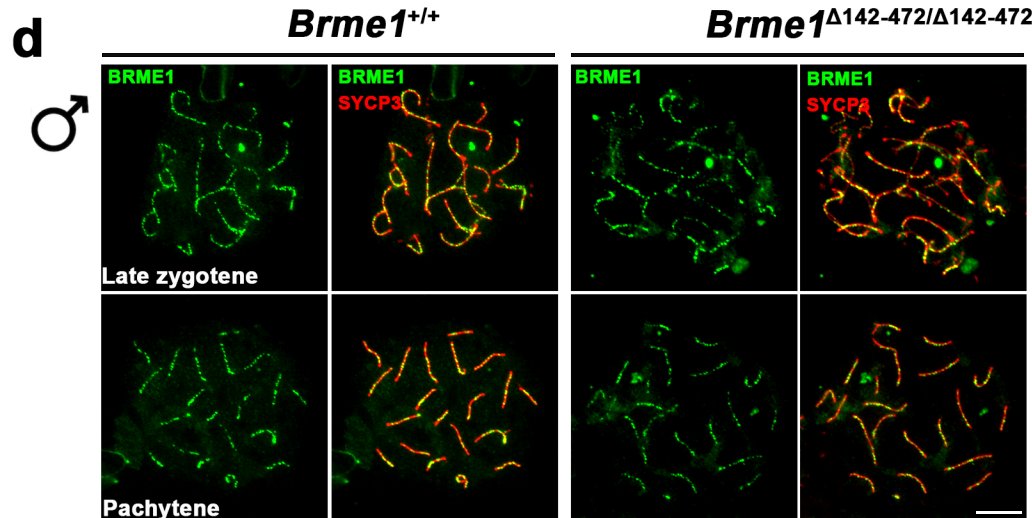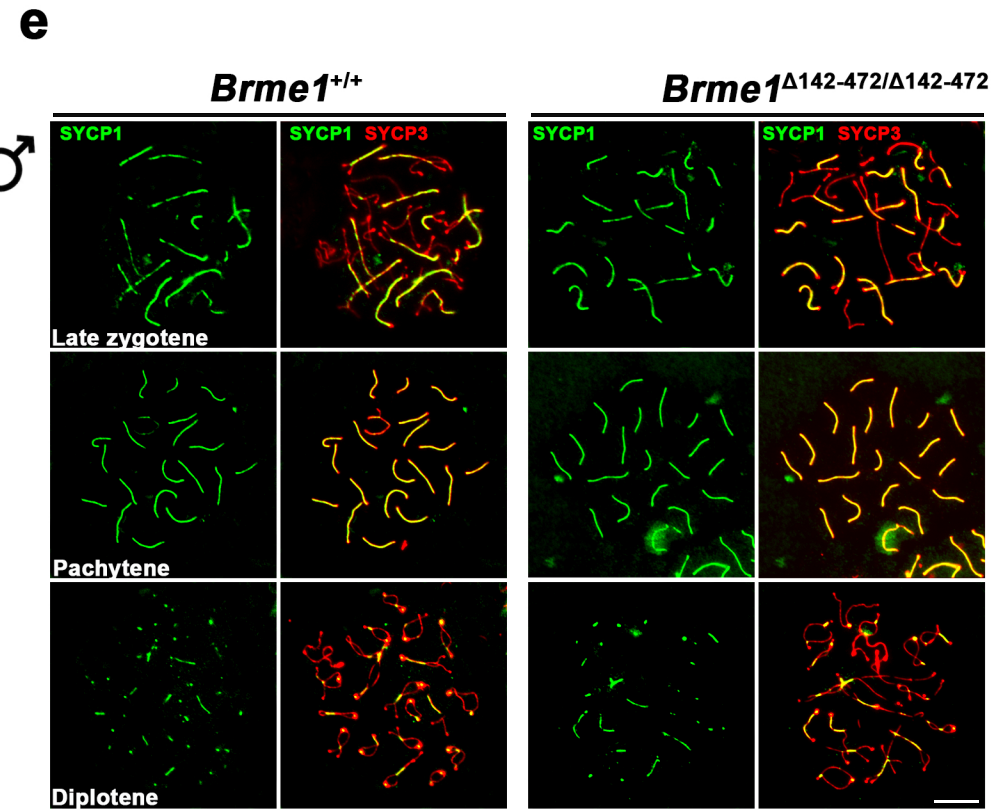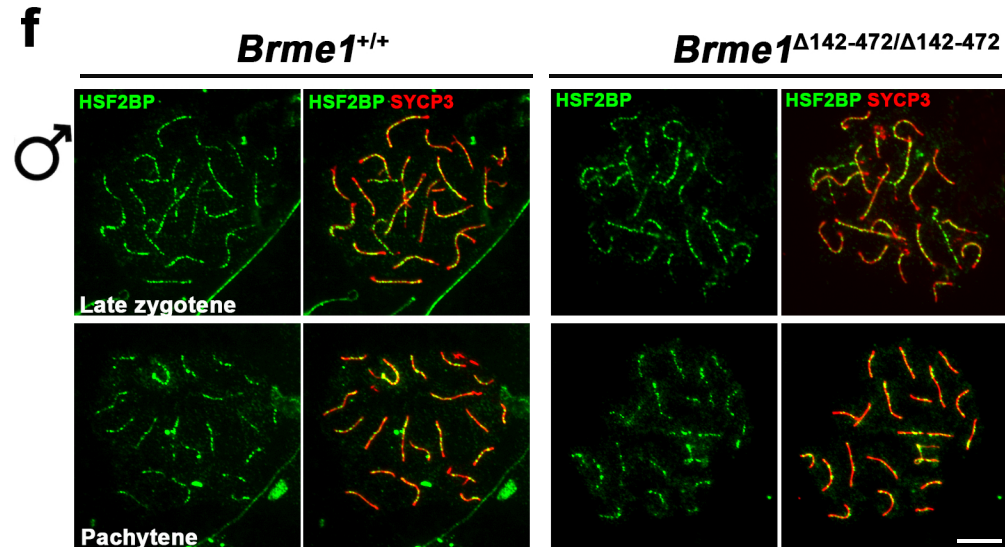

Supplement: supp [file elife-56996-supp-v1.zip]
